# 1 *In situ* architecture of neuronal $\alpha$ -Synuclein inclusions

2

3 Victoria A. Trinkaus<sup>1, 2, 3</sup>, Irene Riera-Tur<sup>4, 5</sup>, Antonio Martínez-Sánchez<sup>6, 7, 8</sup>, Felix J.B.  
4 Bäuerlein<sup>6</sup>, Qiang Guo<sup>6</sup>, Thomas Arzberger<sup>3, 9, 10</sup>, Wolfgang Baumeister<sup>6</sup>, Irina Dudanova<sup>4, 5</sup>,  
5 Mark S. Hipp<sup>1, 3, 11, 12</sup>, F. Ulrich Hartl<sup>1, 3, \*</sup> and Rubén Fernández-Busnadiego<sup>6, 7, 8, \*</sup>

6

7 <sup>1</sup> Department of Cellular Biochemistry, Max Planck Institute of Biochemistry, 82152  
8 Martinsried, Germany.

9 <sup>2</sup> Graduate School of Quantitative Biosciences Munich, 81337 Munich , Germany.

10 <sup>3</sup> Munich Cluster for Systems Neurology (SyNergy), 81377 Munich, Germany.

11 <sup>4</sup> Molecular Neurodegeneration Group, Max Planck Institute of Neurobiology, 82152  
12 Martinsried, Germany.

13 <sup>5</sup> Department of Molecules - Signaling – Development, Max Planck Institute of Neurobiology,  
14 82152 Martinsried, Germany.

15 <sup>6</sup> Department of Molecular Structural Biology, Max Planck Institute of Biochemistry, 82152  
16 Martinsried, Germany.

17 <sup>7</sup> Institute of Neuropathology, University Medical Center Göttingen, 37099 Göttingen, Germany.

18 <sup>8</sup> Cluster of Excellence "Multiscale Bioimaging: from Molecular Machines to Networks of  
19 Excitable Cells" (MBExC), University of Göttingen, Germany.

20 <sup>9</sup> Center for Neuropathology and Prion Research, Ludwig-Maximilians-University Munich,  
21 81377 Munich, Germany

22 <sup>10</sup> Department of Psychiatry and Psychotherapy, University Hospital, Ludwig-Maximilians-  
23 University Munich, 80336 Munich, Germany.

24 <sup>11</sup> Department of Biomedical Sciences of Cells and Systems, University of Groningen,  
25 Groningen, The Netherlands.

26 <sup>12</sup> School of Medicine and Health Sciences, Carl von Ossietzky University Oldenburg,  
27 Oldenburg, Germany.

28 \* To whom correspondence should be addressed: [uhartl@biochem.mpg.de](mailto:uhartl@biochem.mpg.de) and  
29 [ruben.fernandezbusnadiego@med.uni-goettingen.de](mailto:ruben.fernandezbusnadiego@med.uni-goettingen.de)

30

31

## 32 Summary

33  $\alpha$ -Synuclein ( $\alpha$ -Syn) aggregation is a hallmark of devastating neurodegenerative disorders  
34 including Parkinson's disease (PD) and multiple systems atrophy (MSA)<sup>1,2</sup>.  $\alpha$ -Syn aggregates  
35 spread throughout the brain during disease progression<sup>2</sup>, suggesting mechanisms of intercellular  
36 seeding. Formation of  $\alpha$ -Syn amyloid fibrils is observed *in vitro*<sup>3,4</sup> and fibrillar  $\alpha$ -Syn has been  
37 purified from patient brains<sup>5,6</sup>, but recent reports questioned whether disease-relevant  $\alpha$ -Syn  
38 aggregates are fibrillar in structure<sup>7-9</sup>. Here we use cryo-electron tomography (cryo-ET) to image  
39 neuronal Lewy body-like  $\alpha$ -Syn inclusions *in situ* at molecular resolution. We show that the  
40 inclusions consist of  $\alpha$ -Syn fibrils crisscrossing a variety of cellular organelles such as the  
41 endoplasmic reticulum (ER), mitochondria and autophagic structures, without interacting with  
42 membranes directly. Neuronal inclusions seeded by recombinant or MSA patient-derived  $\alpha$ -Syn  
43 aggregates have overall similar architecture, although MSA-seeded fibrils show higher structural  
44 flexibility. Using gold-labeled seeds we find that aggregate nucleation is predominantly mediated  
45 by  $\alpha$ -Syn oligomers, with fibrils growing unidirectionally from the seed. Our results conclusively  
46 demonstrate that neuronal  $\alpha$ -Syn inclusions contain  $\alpha$ -Syn fibrils intermixed with cellular  
47 membranes, and illuminate the mechanism of aggregate nucleation.

48



## 50 Main

51 Early electron microscopy (EM) studies suggested that the Lewy body inclusions characteristic  
52 of PD are fibrillar<sup>10,11</sup>. However, conventional EM lacks the resolution to unequivocally  
53 determine the molecular identity of Lewy body fibrils *in situ*, a problem further complicated by  
54 the cross-reactivity of  $\alpha$ -Syn antibodies with neurofilaments<sup>12</sup>. A recent study using correlative  
55 EM on chemically fixed PD brain tissue suggested that cellular membranes were the main  
56 component of Lewy bodies, alongside with unidentified fibrillar material<sup>7</sup>. These findings  
57 resonated with reports<sup>13</sup> that native  $\alpha$ -Syn binds lipids such as synaptic vesicle membranes<sup>14</sup>,  
58 observations that lipids can catalyze  $\alpha$ -Syn aggregation *in vitro*<sup>15</sup>, and that  $\alpha$ -Syn expression in  
59 cells is associated with membrane abnormalities<sup>9</sup>. Thus, the disease relevance of fibrillar  
60 (amyloid-like)  $\alpha$ -Syn aggregation has been questioned, leading to a model in which the main role  
61 of  $\alpha$ -Syn in Lewy bodies is to cluster cellular membranes<sup>8,9</sup>. Cryo-ET is ideally positioned to test  
62 these new ideas, as it can reveal the molecular architecture of protein aggregates at high  
63 resolution within neurons pristinely preserved by vitrification<sup>16-18</sup>.

64 We performed cryo-ET on neuronal  $\alpha$ -Syn aggregates using a well-established seeding  
65 paradigm that recapitulates key features of pathological Lewy bodies and their inter-neuronal  
66 spreading<sup>19</sup>. Primary mouse neurons were cultured on EM grids, transduced with GFP- $\alpha$ -Syn and  
67 incubated with recombinant  $\alpha$ -Syn pre-formed fibrils (PFFs) (Extended Data Fig. 1a). Unless  
68 otherwise stated, all experiments were carried out using the familial A53T  $\alpha$ -Syn mutation due to  
69 its higher seeding potency<sup>20</sup>. As reported<sup>19</sup>, seeding of neurons led to the formation of GFP- $\alpha$ -  
70 Syn inclusions that were positive for Lewy body markers including phospho- $\alpha$ -Syn (Ser129) and  
71 p62 (Extended Data Fig. 1b, c). GFP- $\alpha$ -Syn inclusions in cell bodies or neurites were targeted for  
72 cryo-ET by correlative microscopy and cryo-focused ion beam (cryo-FIB) milling<sup>16-18,21,22</sup>  
73 (Extended Data Fig. 2). In all cases, this analysis revealed large fibrillar accumulations at sites of  
74 GFP- $\alpha$ -Syn fluorescence (Fig. 1a, d). Interestingly, the fibrils appeared to be composed of a core  
75 decorated by globular GFP-like densities (Fig. 1b), reminiscent of GFP-labeled polyQ and  
76 *C9orf72* poly-GA aggregates<sup>16,17</sup>, and were clearly distinct from cytoskeletal elements (Fig. 1c).  
77 Notably, these fibrillar accumulations were populated by numerous cellular organelles, including  
78 ER, mitochondria, autophagolysosomal structures and small vesicles (Fig. 1a, d). Thus, the  $\alpha$ -  
79 Syn inclusions formed in our cellular system recapitulated the key ultrastructural features of  
80 Lewy bodies, consistent with recent reports<sup>7,23</sup>.

81 To further investigate the nature of the fibrils observed at sites of GFP- $\alpha$ -Syn  
82 fluorescence and avoid possible artifacts caused by GFP- $\alpha$ -Syn overexpression, we next imaged  
83 inclusions formed by endogenous  $\alpha$ -Syn in neurons seeded by recombinant PFFs. Given the high  
84 p62 signal observed in Lewy bodies<sup>1,24</sup> and GFP- $\alpha$ -Syn inclusions (Extended Data Fig. 1c), we  
85 expressed p62-RFP as a surrogate marker<sup>17</sup> of endogenous  $\alpha$ -Syn inclusions (Extended Data Fig.  
86 1d) to guide correlative cryo-FIB/ET analysis. Although endogenous  $\alpha$ -Syn inclusions were  
87 smaller than those formed by GFP- $\alpha$ -Syn (Extended Data Fig. 1b), cryo-ET imaging revealed a  
88 similar nanoscale organization, consisting of cellular membranes crisscrossed by abundant fibrils  
89 (Fig. 1e, h). Importantly, the fibrils appeared identical to those observed in GFP- $\alpha$ -Syn inclusions  
90 (Fig. 1b), except that they were not decorated by globular densities (Fig. 1f). The fibrils were  
91 also clearly distinct from neurofilaments (Fig. 1g). These data conclusively demonstrate that the  
92 fibrils observed in  $\alpha$ -Syn inclusions are formed by  $\alpha$ -Syn, and argue against a major effect of  
93 GFP- $\alpha$ -Syn overexpression on inclusion architecture. Nevertheless, GFP- $\alpha$ -Syn overexpression  
94 enhanced the rate of inclusion formation and neuronal toxicity (Extended Data Fig. 1e, f),  
95 implicating  $\alpha$ -Syn aggregates in neuronal death.

96 Recent studies have demonstrated that amyloid fibrils, including those formed by  $\alpha$ -Syn,  
97 may adopt different conformations when purified from patient brain in comparison to fibrils  
98 generated *in vitro* from recombinant proteins<sup>25,26</sup>. Therefore, to assess the disease relevance of  
99 our findings using recombinant PFFs, we seeded primary neurons expressing GFP- $\alpha$ -Syn with  $\alpha$ -  
100 Syn aggregates purified from MSA patient brain (Extended Data Fig. 3). Similar to PFFs, MSA  
101 seeds triggered the formation of intracellular GFP- $\alpha$ -Syn inclusions positive for phospho- $\alpha$ -Syn  
102 (Ser129) and p62 (Extended Data Fig. 3e). Most importantly, cryo-ET analysis showed that  
103 MSA-seeded neuronal aggregates also consisted of a dense meshwork of  $\alpha$ -Syn fibrils  
104 interspersed by cellular organelles (Fig. 2a, b, c). Therefore, our results show that neuronal  $\alpha$ -Syn  
105 aggregates seeded by patient material are formed by accumulations of  $\alpha$ -Syn fibrils and cellular  
106 membranes.

107 We further investigated possible morphological differences between fibrils seeded by  
108 PFFs and MSA aggregates, and in neurons expressing endogenous  $\alpha$ -Syn or GFP- $\alpha$ -Syn. In all  
109 cases mean fibril length was  $\sim$ 250 nm (Fig. 2d, Extended Data Table 1). However, fibril density  
110 within inclusions was significantly higher in cells expressing GFP- $\alpha$ -Syn (Fig. 2e, Extended Data

111 Table 1), likely due to the higher expression level of this construct, resulting in a higher  
112 aggregate load (Extended Data Fig. 1b, e). We next calculated the persistence length of the fibrils  
113 to investigate their mechanical properties. Interestingly, whereas PFF-seeded fibrils in neurons  
114 expressing GFP- $\alpha$ -Syn or endogenous  $\alpha$ -Syn were almost identical in persistence length  
115 (Extended Data Fig. 4), MSA-seeded GFP- $\alpha$ -Syn fibrils displayed a considerably lower  
116 persistence length (Extended Data Fig. 4), reflecting higher structural flexibility. These values  
117 are in the range of those measured for  $\alpha$ -Syn<sup>27</sup> and tau<sup>28</sup> fibrils *in vitro*, as well as for polyQ  
118 fibrils *in situ*<sup>16</sup>. Our measurements are also consistent with single-particle studies reporting a  
119 higher twist, indicative of higher flexibility<sup>29</sup>, for MSA-derived fibrils compared to recombinant  
120 fibrils<sup>26,30</sup>. Thus, different types of exogenous  $\alpha$ -Syn aggregates seed neuronal inclusions with  
121 different mechano-physical properties.

122 The seeding of intracellular aggregation by extracellular aggregates may underlie the  
123 spreading of pathology across different brain regions during the progression of various  
124 neurodegenerative diseases, including synucleinopathies<sup>31</sup>. To gain a better mechanistic  
125 understanding of the seeding process, we tracked the fate of extracellular gold-labeled  $\alpha$ -Syn  
126 seeds upon internalization into neurons expressing GFP- $\alpha$ -Syn. In this case, we used WT PFFs as  
127 they allowed higher labeling efficiency. Recombinant WT  $\alpha$ -Syn fibrils were conjugated to 3-nm  
128 gold beads via NHS ester coupling, resulting in densely gold-labeled PFFs (Fig. 3a) that  
129 efficiently seeded the formation of neuronal GFP- $\alpha$ -Syn inclusions (Extended Data Fig. 5a).  
130 Some of these experiments were also carried out in a SH-SY5Y cell line stably expressing GFP-  
131  $\alpha$ -Syn as a simpler model system (Extended Data Fig. 6). Interestingly, cryo-ET analysis of  
132 inclusions seeded by gold-labeled PFFs showed GFP- $\alpha$ -Syn fibrils with one end decorated by 3-  
133 10 gold particles (Fig. 3b, c), indicating that exogenous seeds nucleate the fibrillation of cellular  
134  $\alpha$ -Syn in a polarized manner, consistent with the polarized structure of  $\alpha$ -Syn fibrils<sup>32</sup>. These data  
135 also show that the nucleation-relevant seeds consist of oligomeric  $\alpha$ -Syn. Therefore, despite the  
136 presence of abundant large fibrils in the exogenously added PFF material (Fig. 3a), these species  
137 are apparently not efficiently internalized. On the other hand, given the mechano-physical  
138 differences between neuronal fibrils growing from PFFs and MSA seeds (Extended Data Fig. 4),  
139 the seeding-competent oligomers likely contain the necessary information to confer these  
140 structural features. Gold-labeled  $\alpha$ -Syn was also observed within the lumen of endolysosomal  
141 compartments (Fig. 3d, Extended Data Fig. 5b) and at their membrane (Fig. 3e, Extended Data

142 Fig. 5b). Although the nucleation of  $\alpha$ -Syn fibrils was occasionally observed directly at such  
143 membrane-bound gold-labeled structures (Fig. 3e, f), most gold-labeled fibrils were cytosolic  
144 (Fig. 3b). These data are in agreement with a model where oligomeric  $\alpha$ -Syn seeds entering the  
145 cell are targeted to endosomes, from which they escape and trigger intracellular nucleation of  $\alpha$ -  
146 Syn fibrils<sup>33</sup>.

147 The affinity of  $\alpha$ -Syn for lipids<sup>13</sup> has led to the proposal that  $\alpha$ -Syn drives the  
148 accumulation of cellular membranes in Lewy bodies<sup>7-9</sup>, e.g. by fibril-membrane contacts as  
149 observed for polyQ fibrils<sup>16</sup>. Such contacts existed within  $\alpha$ -Syn inclusions (Extended Data Fig.  
150 7a, b), but they were extremely rare and did not seem to cause the kind of membrane  
151 deformations (Extended Data Fig. 7a) seen with polyQ<sup>16</sup>. Although we found a few examples  
152 where fibrils did contact membranes at areas of high curvature (Extended Data Fig. 7b), such  
153 areas also existed in the absence of fibril contacts (Extended Data Fig. 7c). Thus, apparent fibril-  
154 membrane contacts seemed to be mainly a consequence of the crowded cellular environment. To  
155 test this hypothesis, we computationally introduced random shifts and rotations to the  
156 experimentally determined positions of  $\alpha$ -Syn fibrils within the tomograms. This analysis  
157 revealed that close fibril-membrane distances ( $< 20$  nm) were significantly more frequent in  
158 random simulations than in the experimental data (Fig. 4a, b; Extended Data Fig. 7d, Extended  
159 Data Table 1). Together, these results indicate that direct interactions between  $\alpha$ -Syn fibrils and  
160 membranes are infrequent and unlikely to induce substantial membrane clustering.

161 However, membrane clustering could also be driven by  $\alpha$ -Syn species smaller than  
162 fibrils, which cannot be readily detected by cryo-ET. For example, soluble  $\alpha$ -Syn molecules can  
163 cluster vesicles at distances shorter than 15 nm *in vitro*<sup>34</sup>. To explore this possibility, we  
164 compared the shortest distances between all cellular membranes in tomograms of  $\alpha$ -Syn  
165 inclusions and in untransduced, unseeded control neurons. This analysis revealed that close  
166 contacts ( $< 20$  nm) between membranes were similarly common within  $\alpha$ -Syn inclusions as in  
167 control cells (Fig. 4c; Extended Data Fig. 7e, Extended Data Table 1), arguing against  $\alpha$ -Syn-  
168 mediated membrane clustering in inclusions.

169 Altogether, we show that neuronal  $\alpha$ -Syn aggregates consist of both  $\alpha$ -Syn fibrils and  
170 various cellular membranes, reconciling conflicting reports on the molecular architecture of  
171 Lewy bodies. Our findings strongly support the view that the unidentified fibrils observed in



172 Lewy bodies of postmortem brain tissue<sup>7</sup> are indeed  $\alpha$ -Syn fibrils. Intracellular  $\alpha$ -Syn  
173 aggregation can be triggered by internalized extracellular oligomeric seeds, suggesting that this  
174 mechanism underlies the spreading of aggregate pathology. However,  $\alpha$ -Syn does not drive  
175 membrane clustering directly. Thus, the question why membrane structures are enriched in Lewy  
176 bodies remains to be addressed. An intriguing possibility is that vesicular organelles accumulate  
177 in Lewy bodies as a result of the impairment of the autophagic and endolysosomal machineries  
178 by  $\alpha$ -Syn aggregation<sup>35</sup>.

179

## 180 Main references

- 181 1 Henderson, M. X., Trojanowski, J. Q. & Lee, V. M. alpha-Synuclein pathology in  
182 Parkinson's disease and related alpha-synucleinopathies. *Neurosci. Lett.* **709**, 134316,  
183 doi:10.1016/j.neulet.2019.134316 (2019).
- 184 2 Goedert, M., Spillantini, M. G., Del Tredici, K. & Braak, H. 100 years of Lewy  
185 pathology. *Nat Rev Neurol* **9**, 13-24, doi:10.1038/nrneurol.2012.242 (2013).
- 186 3 Conway, K. A., Harper, J. D. & Lansbury, P. T. Accelerated in vitro fibril formation by a  
187 mutant alpha-synuclein linked to early-onset Parkinson disease. *Nat. Med.* **4**, 1318-1320,  
188 doi:10.1038/3311 (1998).
- 189 4 Giasson, B. I., Uryu, K., Trojanowski, J. Q. & Lee, V. M. Mutant and wild type human  
190 alpha-synucleins assemble into elongated filaments with distinct morphologies in vitro. *J.*  
191 *Biol. Chem.* **274**, 7619-7622, doi:10.1074/jbc.274.12.7619 (1999).
- 192 5 Spillantini, M. G. *et al.* Filamentous alpha-synuclein inclusions link multiple system  
193 atrophy with Parkinson's disease and dementia with Lewy bodies. *Neurosci. Lett.* **251**,  
194 205-208, doi:10.1016/s0304-3940(98)00504-7 (1998).
- 195 6 Spillantini, M. G., Crowther, R. A., Jakes, R., Hasegawa, M. & Goedert, M. alpha-  
196 Synuclein in filamentous inclusions of Lewy bodies from Parkinson's disease and  
197 dementia with lewy bodies. *Proc Natl Acad Sci U S A* **95**, 6469-6473,  
198 doi:10.1073/pnas.95.11.6469 (1998).
- 199 7 Shahmoradian, S. H. *et al.* Lewy pathology in Parkinson's disease consists of crowded  
200 organelles and lipid membranes. *Nat. Neurosci.* **22**, 1099-1109, doi:10.1038/s41593-019-  
201 0423-2 (2019).
- 202 8 Bartels, T. A traffic jam leads to Lewy bodies. *Nat. Neurosci.* **22**, 1043-1045,  
203 doi:10.1038/s41593-019-0435-y (2019).
- 204 9 Fanning, S., Selkoe, D. & Dettmer, U. Parkinson's disease: proteinopathy or lipidopathy?  
205 *NPJ Parkinsons Dis* **6**, 3, doi:10.1038/s41531-019-0103-7 (2020).
- 206 10 Forno, L. S. Neuropathology of Parkinson's disease. *J. Neuropathol. Exp. Neurol.* **55**,  
207 259-272, doi:10.1097/00005072-199603000-00001 (1996).
- 208 11 Roy, S. & Wolman, L. Ultrastructural observations in Parkinsonism. *J. Pathol.* **99**, 39-44,  
209 doi:10.1002/path.1710990106 (1969).
- 210 12 Sacino, A. N. *et al.* Amyloidogenic alpha-synuclein seeds do not invariably induce rapid,  
211 widespread pathology in mice. *Acta Neuropathol* **127**, 645-665, doi:10.1007/s00401-014-  
212 1268-0 (2014).
- 213 13 Galvagnion, C. The Role of Lipids Interacting with alpha-Synuclein in the Pathogenesis  
214 of Parkinson's Disease. *J Parkinsons Dis* **7**, 433-450, doi:10.3233/JPD-171103 (2017).
- 215 14 Fusco, G., Sanz-Hernandez, M. & De Simone, A. Order and disorder in the physiological  
216 membrane binding of alpha-synuclein. *Curr. Opin. Struct. Biol.* **48**, 49-57,  
217 doi:10.1016/j.sbi.2017.09.004 (2018).
- 218 15 Galvagnion, C. *et al.* Chemical properties of lipids strongly affect the kinetics of the  
219 membrane-induced aggregation of alpha-synuclein. *Proc Natl Acad Sci U S A* **113**, 7065-  
220 7070, doi:10.1073/pnas.1601899113 (2016).
- 221 16 Bauerlein, F. J. B. *et al.* In Situ Architecture and Cellular Interactions of PolyQ  
222 Inclusions. *Cell* **171**, 179-187 e110, doi:10.1016/j.cell.2017.08.009 (2017).
- 223 17 Guo, Q. *et al.* In Situ Structure of Neuronal C9orf72 Poly-GA Aggregates Reveals  
224 Proteasome Recruitment. *Cell* **172**, 696-705 e612, doi:10.1016/j.cell.2017.12.030 (2018).

- 225 18 Schaefer, T. *et al.* Amyloid-like aggregates cause lysosomal defects in neurons via gain-  
226 of-function toxicity. *bioRxiv*, 2019.2012.2016.877431, doi:10.1101/2019.12.16.877431  
227 (2019).
- 228 19 Volpicelli-Daley, L. A., Luk, K. C. & Lee, V. M. Addition of exogenous alpha-synuclein  
229 preformed fibrils to primary neuronal cultures to seed recruitment of endogenous alpha-  
230 synuclein to Lewy body and Lewy neurite-like aggregates. *Nat Protoc* **9**, 2135-2146,  
231 doi:10.1038/nprot.2014.143 (2014).
- 232 20 Luk, K. C. *et al.* Molecular and Biological Compatibility with Host Alpha-Synuclein  
233 Influences Fibril Pathogenicity. *Cell Rep* **16**, 3373-3387,  
234 doi:10.1016/j.celrep.2016.08.053 (2016).
- 235 21 Rigort, A. *et al.* Focused ion beam micromachining of eukaryotic cells for cryoelectron  
236 tomography. *Proc Natl Acad Sci U S A* **109**, 4449-4454, doi:10.1073/pnas.1201333109  
237 (2012).
- 238 22 Marko, M., Hsieh, C., Schalek, R., Frank, J. & Mannella, C. Focused-ion-beam thinning  
239 of frozen-hydrated biological specimens for cryo-electron microscopy. *Nat. Methods* **4**,  
240 215-217, doi:10.1038/nmeth1014 (2007).
- 241 23 Lashuel, H. A. Do Lewy bodies contain alpha-synuclein fibrils? and Does it matter? A  
242 brief history and critical analysis of recent reports. *Neurobiol Dis* **141**, 104876,  
243 doi:10.1016/j.nbd.2020.104876 (2020).
- 244 24 Kuusisto, E., Salminen, A. & Alafuzoff, I. Ubiquitin-binding protein p62 is present in  
245 neuronal and glial inclusions in human tauopathies and synucleinopathies. *Neuroreport*  
246 **12**, 2085-2090, doi:10.1097/00001756-200107200-00009 (2001).
- 247 25 Zhang, W. *et al.* Heparin-induced tau filaments are polymorphic and differ from those in  
248 Alzheimer's and Pick's diseases. *Elife* **8**, e43584, doi:10.7554/eLife.43584 (2019).
- 249 26 Schweighauser, M. *et al.* Structures of alpha-synuclein filaments from multiple system  
250 atrophy. *Nature*, doi:10.1038/s41586-020-2317-6 (2020).
- 251 27 Makky, A., Bousset, L., Polesel-Maris, J. & Melki, R. Nanomechanical properties of  
252 distinct fibrillar polymorphs of the protein alpha-synuclein. *Sci Rep* **6**, 37970,  
253 doi:10.1038/srep37970 (2016).
- 254 28 Wegmann, S. *et al.* Human Tau isoforms assemble into ribbon-like fibrils that display  
255 polymorphic structure and stability. *J. Biol. Chem.* **285**, 27302-27313,  
256 doi:10.1074/jbc.M110.145318 (2010).
- 257 29 Lu, L., Deng, Y., Li, X., Li, H. & Karniadakis, G. E. Understanding the Twisted  
258 Structure of Amyloid Fibrils via Molecular Simulations. *J Phys Chem B* **122**, 11302-  
259 11310, doi:10.1021/acs.jpcc.8b07255 (2018).
- 260 30 Guerrero-Ferreira, R. *et al.* Two new polymorphic structures of human full-length alpha-  
261 synuclein fibrils solved by cryo-electron microscopy. *Elife* **8**, e48907,  
262 doi:10.7554/eLife.48907 (2019).
- 263 31 Jucker, M. & Walker, L. C. Self-propagation of pathogenic protein aggregates in  
264 neurodegenerative diseases. *Nature* **501**, 45-51, doi:10.1038/nature12481 (2013).
- 265 32 Guerrero-Ferreira, R. *et al.* Cryo-EM structure of alpha-synuclein fibrils. *Elife* **7**, e36402,  
266 doi:10.7554/eLife.36402 (2018).
- 267 33 Karpowicz, R. J., Jr. *et al.* Selective imaging of internalized proteopathic alpha-synuclein  
268 seeds in primary neurons reveals mechanistic insight into transmission of  
269 synucleinopathies. *J. Biol. Chem.* **292**, 13482-13497, doi:10.1074/jbc.M117.780296  
270 (2017).

271 34 Fusco, G. *et al.* Structural basis of synaptic vesicle assembly promoted by alpha-  
272 synuclein. *Nat Commun* **7**, 12563, doi:10.1038/ncomms12563 (2016).  
273 35 Arotcarena, M. L., Teil, M. & Dehay, B. Autophagy in Synucleinopathy: The  
274 Overwhelmed and Defective Machinery. *Cells* **8**, doi:10.3390/cells8060565 (2019).  
275

276 **Figures**

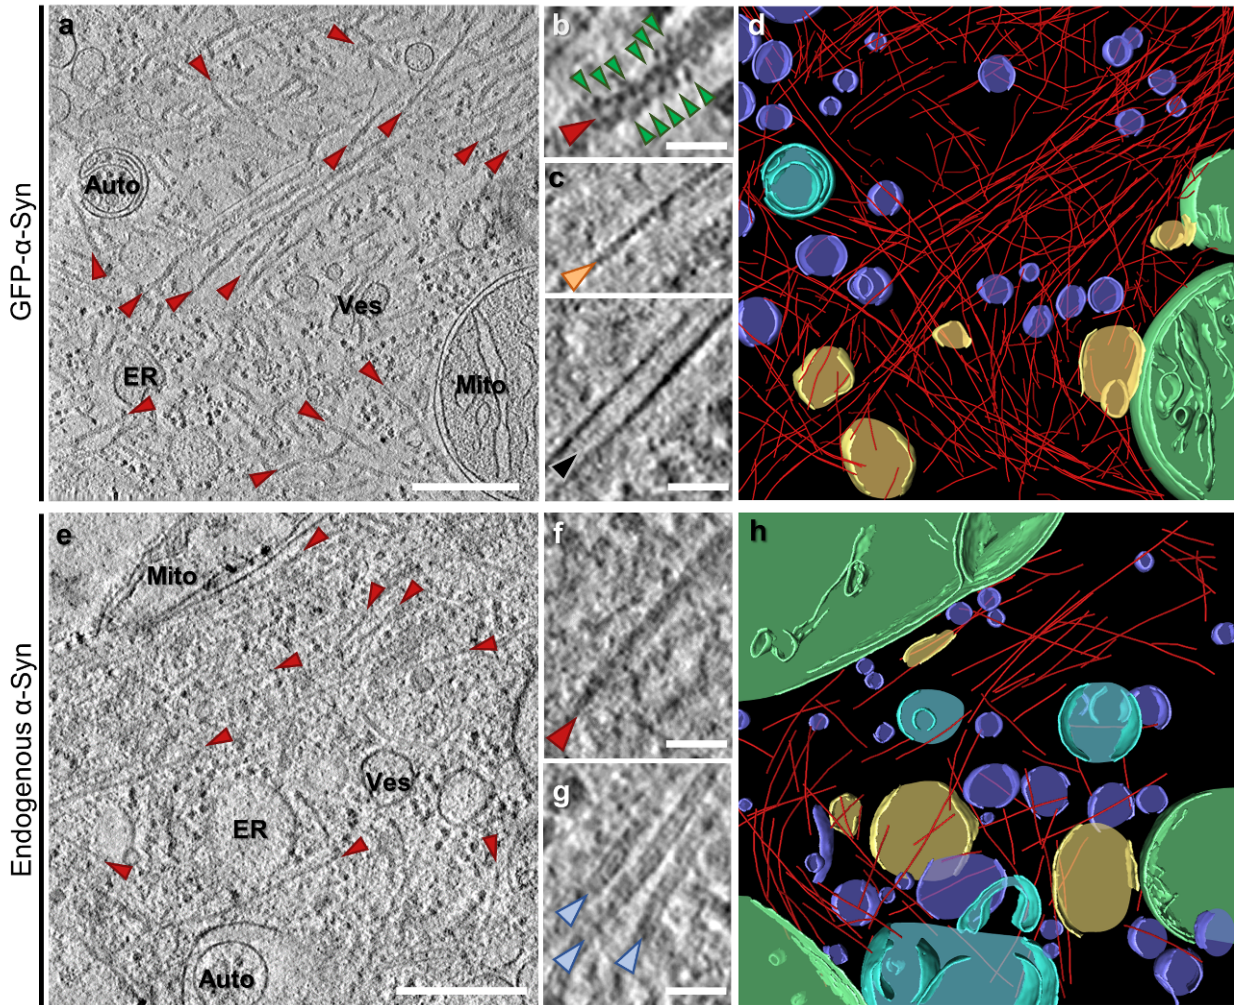

277

278

279 **Fig. 1 | Cryo-ET imaging of  $\alpha$ -Syn aggregates seeded by PFFs in neurons.** **a**, A tomographic  
280 slice (thickness 1.8 nm) of an inclusion seeded by PFFs in a neuron expressing GFP- $\alpha$ -Syn.  
281 Auto: autophagosome; ER: endoplasmic reticulum; Mito: mitochondrion; Ves: vesicles. Fibrils  
282 are marked by red arrowheads. Scale bar: 350 nm. **b**, Magnified view of a fibril with GFP-like  
283 densities (green arrowheads) decorating the fibril core. Scale bar: 30 nm. **c**, Magnified views of  
284 an actin filament (orange arrowhead) and a microtubule (black arrowhead). Scale bar: 30 nm. **d**,  
285 3D rendering of **a** showing  $\alpha$ -Syn fibrils (red), an autophagosome (cyan), ER (yellow),  
286 mitochondria (green) and various vesicles (purple). **e**, A tomographic slice (thickness 1.4 nm)  
287 of an inclusion seeded by PFFs in a neuron expressing p62-RFP. Scale bar: 350 nm. **f**, Magnified  
288 view of a fibril. Note that fibrils in cells not expressing GFP- $\alpha$ -Syn are not decorated by GFP-

289 like densities. Scale bar: 30 nm. **g**, Magnified view of neurofilaments (blue arrowheads). Scale  
290 bar: 30 nm. **h**, 3D rendering of **e**.  
291

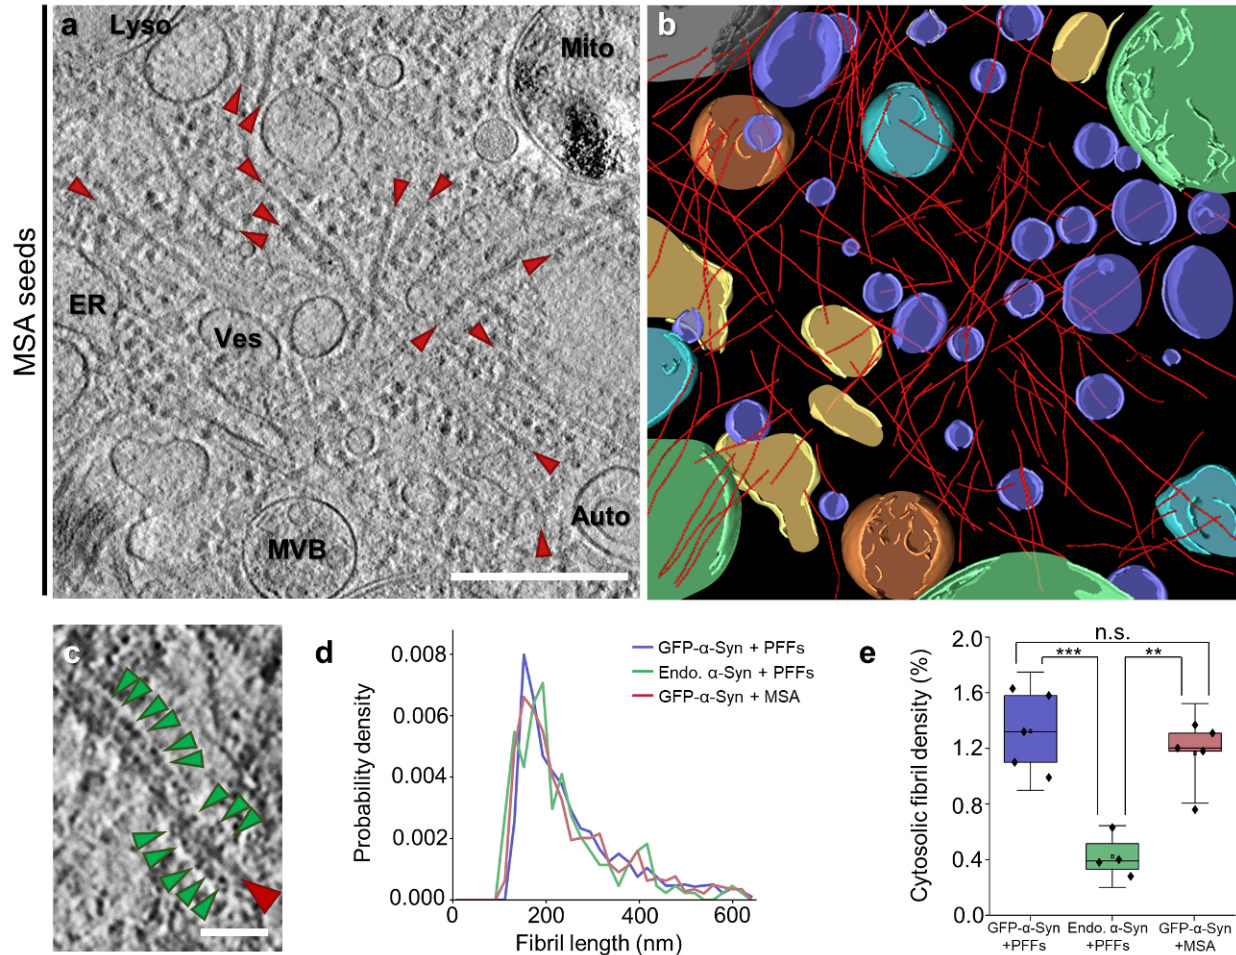

292

293

294 **Fig. 2 | Cryo-ET imaging of  $\alpha$ -Syn aggregates seeded by MSA patient brain material in**  
295 **neurons. a**, A tomographic slice (thickness 1.4 nm) of an inclusion seeded by MSA patient brain  
296 material in a neuron expressing GFP- $\alpha$ -Syn. Auto: autophagosome; ER: endoplasmic reticulum;  
297 Lyso: lysosome; Mito: mitochondrion; MVB: multivesicular body; Ves: vesicles. Fibrils are  
298 marked by red arrowheads. Scale bar: 350 nm. **b**, 3D rendering of **a** showing  $\alpha$ -Syn fibrils (red),  
299 autophagosomes (cyan), ER (yellow), a lysosome (grey), mitochondria (green), multivesicular  
300 bodies (orange) and various vesicles (purple). **c**, Magnified view of a fibril with GFP-like  
301 densities (green arrowheads) decorating the fibril core. Scale bar: 30 nm. **d**, Histogram of fibril  
302 length. N = 1471 (GFP- $\alpha$ -Syn + PFFs), 220 (endogenous  $\alpha$ -Syn + PFFs) and 721 (GFP- $\alpha$ -Syn +  
303 MSA) fibrils analyzed. See also Extended Data Table 1. **e**, Box plots of cytosolic fibril density  
304 within inclusions. The horizontal lines of each box represent 75% (top), 50% (middle) and 25%  
305 (bottom) of the values, and a black square the average value. Whiskers represent standard

306 deviation and black diamonds the individual data points. N = 5 (GFP- $\alpha$ -Syn + PFFs), 4  
307 (endogenous  $\alpha$ -Syn + PFFs) and 5 (GFP- $\alpha$ -Syn + MSA) tomograms analyzed; n.s., \*\* and \*\*\*  
308 indicate respectively  $p = 0.4$ ,  $p = 0.0010$  and  $p = 7 \cdot 10^{-4}$  by one-way ANOVA. See also Extended  
309 Data Table 1.  
310



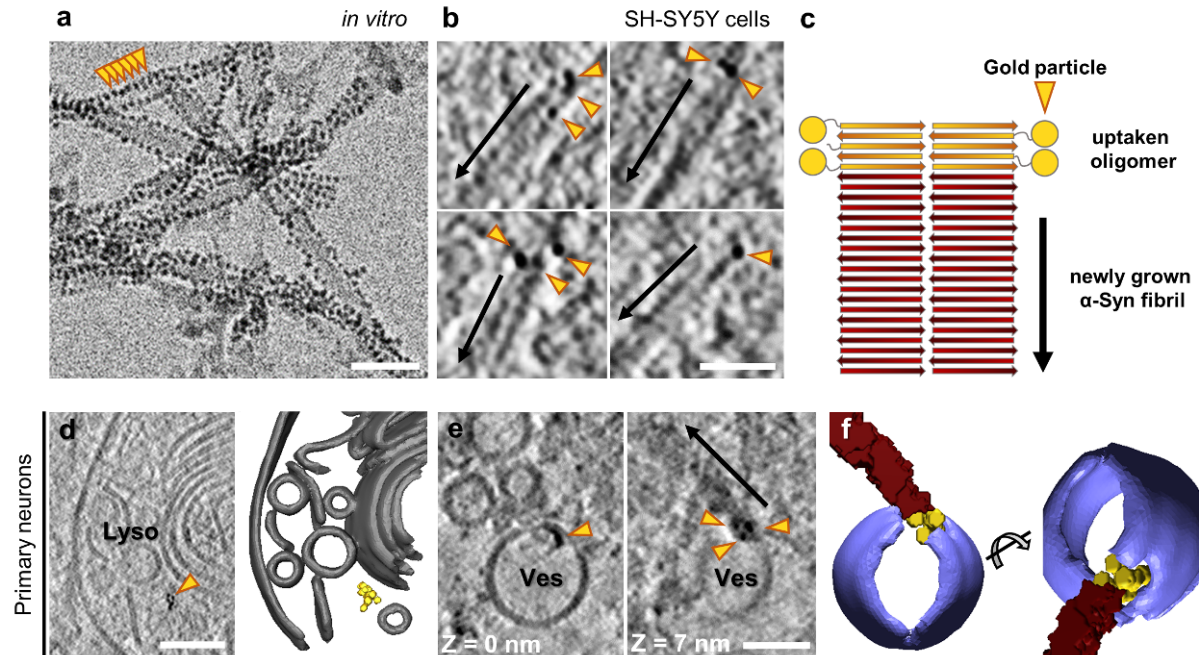

311

312

313 **Fig. 3 | Seeding of  $\alpha$ -Syn aggregates by gold-labeled PFFs.** **a**, Cryo-electron microscopy image  
314 of PFFs labeled with 3 nm-gold beads (orange arrowheads) via NHS-esterification. Scale bar: 30  
315 nm. **b**, Tomographic slices (thickness 1.8 nm) showing  $\alpha$ -Syn fibrils nucleated by gold-labeled  
316 PFFs within SH-SY5Y cells expressing GFP- $\alpha$ -Syn. Arrows mark the direction of fibril growth  
317 from the gold-labeled seed. Scale bar: 40 nm. **c**, Schematic of the hypothetical molecular  
318 organization of  $\alpha$ -Syn fibrils nucleated by gold-labeled PFFs. **d**, A tomographic slice (thickness  
319 1.4 nm; left) and 3D rendering (right) showing gold-labeled PFFs within the lumen of a  
320 lysosome in a primary neuron expressing GFP- $\alpha$ -Syn. Lyso: lysosome. Lysosomal membranes  
321 (grey), gold particles labeling the PFF (yellow). Scale bar: 70 nm. **e**, Tomographic slices  
322 (thickness 1.4 nm) at different Z heights showing gold labeled PFFs found within the membrane  
323 of a vesicle (Ves) and nucleating an  $\alpha$ -Syn fibril (arrow) in a primary neuron expressing GFP- $\alpha$ -  
324 Syn. Scale bar: 30 nm. **f**, 3D rendering of **e** in two different orientations. Vesicle membrane  
325 (purple),  $\alpha$ -Syn fibril (red), gold particles (yellow).

326

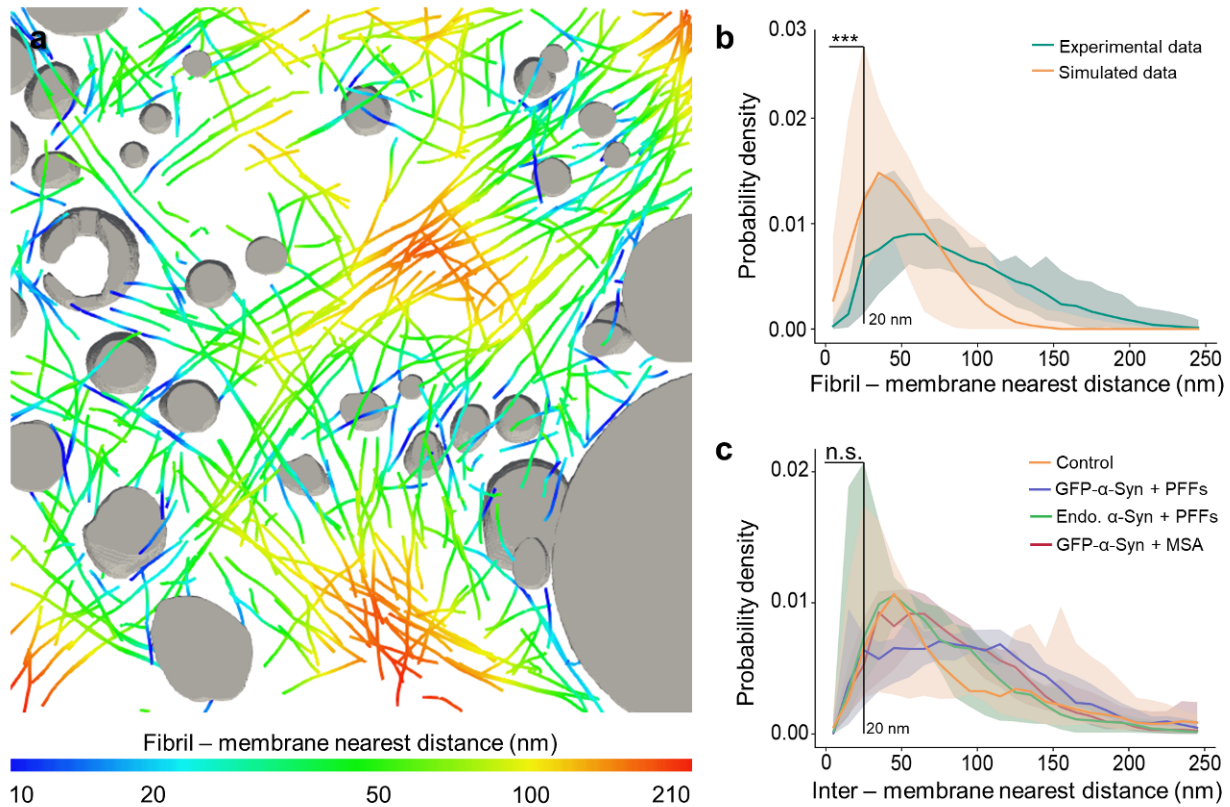

327

328

329 **Fig. 4 | Quantification of fibril-membrane and inter-membrane distances within  $\alpha$ -Syn**

330 **inclusions. a**, Visualization of fibril-membrane distances in the tomogram rendered in Fig. 1d.

331 Organelles are shown in grey, and fibrils are color-coded according to their distance to the

332 nearest organelle membrane. **b**, Histogram of nearest distances between a fibril and a membrane

333 in the pooled experimental data (N = 14 tomograms, including 5 of GFP- $\alpha$ -Syn + PFFs, 4 of

334 endogenous  $\alpha$ -Syn + PFFs and 5 of GFP- $\alpha$ -Syn + MSA) and in simulations shifting and rotating

335 fibrils from their experimentally determined positions (200 simulations for each experimental

336 tomogram). Solid lines represent the median of all tomograms. The shaded areas represent 5-

337 95% confidence intervals. Fibril-membrane distances < 20 nm are significantly more abundant in

338 the simulated data ( $p = 2.4 \times 10^{-10}$  by two-tailed Kolmogorov-Smirnov test). See also Extended

339 Data Table 1. **c**, Histogram of inter-membrane nearest distances for all organellar membranes in

340 the tomograms. Intermembrane distances are not significantly different within  $\alpha$ -Syn inclusions

341 than in control untransduced and unseeded cells ( $p = 0.754$  by two-tailed Kolmogorov-Smirnov

342 test). N = 5 (untransduced - PFFs), 5 (GFP- $\alpha$ -Syn + PFFs), 4 (endogenous  $\alpha$ -Syn + PFFs) and 5

343 (GFP- $\alpha$ -Syn + MSA) tomograms analyzed. See also Extended Data Table 1.

## 344 [Methods](#)

### 345 [Plasmids](#)

346 Plasmids for the expression of recombinant  $\alpha$ -Syn were: pT7-7  $\alpha$ -Syn (Addgene plasmid  
347 #36046<sup>36</sup>; <http://n2t.net/addgene:36046> ; RRID:Addgene\_36046) and pT7-7  $\alpha$ -Syn A53T  
348 (Addgene plasmid #105727<sup>37</sup>; <http://n2t.net/addgene:105727>; RRID:Addgene\_105727) (gift  
349 from Hilal Lashuel).

350 Plasmid EGFP- $\alpha$ -SynA53T (Addgene plasmid #40823<sup>38</sup>; <http://n2t.net/addgene:40823>;  
351 RRID:Addgene\_40823) was used for expression in SH-SY5Y cells (gift from David  
352 Rubinsztein).

353 The following plasmids were used for viral transfections: pFhSynW2<sup>39</sup> (GFP-SynA53T-Flag,  
354 Flag-GFP), FU3a (p62-tagRFP)<sup>17</sup>, psPAX2 (a gift from Didier Trono; Addgene plasmid # 12260;  
355 <http://n2t.net/addgene:12260>; RRID:Addgene\_12260) and pVsVg<sup>40</sup>. pFhSynW2 and pVsVg  
356 were a gift of Dieter Edbauer.

357 pFhSynW2 GFP-synA53T-Flag was cloned by inserting the GFP- $\alpha$ -SynA53T sequence from  
358 plasmid EGFP- $\alpha$ -SynA53T between the XmaI and NheI restriction sites using the following  
359 primers: forward: GCA GTC GAG AGG ATC CCG GGC CCA CCA TGG TGA GCA AGG  
360 GCG AG, and reverse: CCG CTC TAG AGC TAG CTT ATT TAT CGT CGT CAT CCT TGT  
361 AAT CGG CTT CAG GTT CGT AGT CTT GAT AC.

362 pFhSynW2 Flag-GFP was cloned by inserting the GFP sequence from the plasmid EGFP- $\alpha$ -  
363 SynA53T between the BamHI and EcoRI restriction sites using the following primers: forward:  
364 GAG CGC AGT CGA GAG GAT CCC CCA CCA TGG ATT ACA AGG ATG ACG ACG  
365 ATA AGC CCG GGA TGG TGA GCA AGG GCG AG, and reverse: GCT TGA TAT CGA  
366 ATT CTT ACT TGT ACA GCT CGT CCA TGC.

### 367 [Antibodies](#)

368 The following primary antibodies were used: GFP (A10262, Thermo Fisher, 1:500; RRID:  
369 AB\_2534023), K48-linked ubiquitin (05-1307, Millipore; 1:500; RRID: AB\_1587578), MAP2  
370 (NB300-213, Novus Biologicals; 1:500; RRID: AB\_2138178), p62 (ab56416, Abcam; 1:200;  
371 RRID: AB\_945626), phospho S129  $\alpha$ -Syn (ab51253, Abcam; 1:500 for immunofluorescence,  
372 1:2500 for western blot; RRID: AB\_869973),  $\alpha$ -Syn (610787, BD Biosciences; 1:1000; RRID:  
373 AB\_398108) and p62 lck ligand (610832, BD Biosciences; 1:100; RRID: AB\_398151).

374 The following secondary antibodies were used: Alexa Fluor 488 AffiniPure Donkey Anti-  
375 Chicken (703-545-155, Jackson ImmunoResearch; 1:250), Alexa Fluor 647 AffiniPure Donkey  
376 Anti-Chicken (703-605-155, Jackson ImmunoResearch; 1:250), Cy3 AffiniPure Donkey Anti-  
377 Rabbit (711-165-152, Jackson ImmunoResearch; 1:250), Alexa Fluor 488 AffiniPure Donkey  
378 Anti-Mouse (715-545-150, Jackson ImmunoResearch; 1:250), Cy3-conjugated AffiniPure Goat  
379 anti-mouse IgG (115-165-003, Jackson ImmunoResearch; 1:1000), Cy3-conjugated AffiniPure  
380 Goat anti-rabbit (111-165-045, Dianova; 1:1000; RRID: AB\_2338003), HRP-conjugated goat  
381 anti-rabbit (A9169, Sigma; 1:5000; RRID: AB\_258434).

### 382 Recombinant $\alpha$ -Syn purification and fibril assembly

383 Recombinant human WT and A53T  $\alpha$ -Syn were purified similarly as described<sup>19</sup>. In brief, E. coli  
384 Rosetta-gami 2(DE3) cells (Novagen) were transformed with pT7-7  $\alpha$ -Syn or pT7-7  $\alpha$ -Syn  
385 A53T. Protein expression was induced by 1 mM IPTG for 4 h. Bacteria were harvested and  
386 pellets were lysed in high salt buffer (750 mM NaCl, 50 mM Tris, pH 7.6, 1 mM EDTA). The  
387 lysate was sonicated for 5 min and boiled subsequently. The boiled suspension was centrifuged,  
388 the supernatant dialyzed in 50 mM NaCl, 10 mM Tris and 1 mM EDTA and purified by size  
389 exclusion HPLC (Superdex 200). Fractions were collected and those containing  $\alpha$ -Syn were  
390 combined. The combined fractions were applied onto an anion exchange column (MonoQ).  $\alpha$ -  
391 Syn was purified by a gradient ranging from 50 mM to 1 M NaCl. Fractions containing  $\alpha$ -Syn  
392 were combined and dialyzed in 150 mM KCl, 50 mM Tris, pH 7.6.

393 For fibril assembly, purified  $\alpha$ -Syn monomers (5 mg/mL) were centrifuged at high speed  
394 (100,000 xg) for 1 h. The supernatant was transferred into a new reaction tube and incubated  
395 with constant agitation (1,000 rpm) at 37 °C for 24 h. The presence of  $\alpha$ -Syn fibrils was  
396 confirmed by negative stain EM. Except for gold labeling experiments, cells were seeded using  
397 A53T  $\alpha$ -Syn PFFs.

398 Labeling of fibrils with 3 nm monovalent gold-beads (Nanopartz) via NHS ester coupling was  
399 performed as described in the manufacturer's protocol. In brief, WT  $\alpha$ -Syn PFFs were dialyzed  
400 in PBS and subsequently added to the gold beads. The reaction was facilitated by constant  
401 agitation at 30 °C for 30 min. Labeled PFFs and free gold beads were separated by sequential  
402 centrifugation and washing with 0.1 % Tween20 and 1 % PBS. Labeling of PFFs with gold  
403 beads was confirmed by negative stain and cryo-EM.

#### 404 Immunohistochemistry on MSA patient brain

405 MSA patient brain tissue was obtained from Neurobiobank Munich (Germany). All autopsy  
406 cases of the Neurobiobank Munich are collected on the basis of an informed consent according  
407 to the guidelines of the ethics commission of the Ludwig-Maximilians-University Munich,  
408 Germany. The experiments performed in this paper were approved by the Max Planck Society's  
409 Ethics Council. The sample was from a male patient who died at the age of 54, 6 years after  
410 being diagnosed with a cerebellar type of MSA. Postmortem delay was ~30 h. Brain regions with  
411 abundant  $\alpha$ -Syn inclusions were identified by postmortem histological examination.

412 For immunohistochemistry (IHC), mouse monoclonal antibody against  $\alpha$ -Syn and p62 Ick ligand  
413 were used. Paraffin sections of human brain tissue were deparaffinated and rehydrated.  
414 Pretreatment (cooking in cell conditioning solution 1, pH 8 for 30 min for  $\alpha$ -Syn IHC or for 56  
415 min in case of p62 IHC), IHC and counterstaining of nuclei with hematoxylin (Roche) and  
416 Bluing reagent (Roche) were performed with the Ventana Bench-Mark XT automated staining  
417 system (Ventana) using the UltraView Universal DAB Detection Kit (Roche). For  $\alpha$ -Syn, IHC  
418 slides were additionally pretreated in 80% formic acid for 15 min after cooking. Slides were  
419 coverslipped with Entellan (Merck) mounting medium. Images were recorded with a BX50  
420 microscope (Olympus) using a 40x objective and cellSens software (Olympus).

#### 421 Preparation of the sarkosyl-insoluble fraction from MSA patient brain

422 Preparation of sarkosyl-insoluble fraction was performed as previously described<sup>41</sup>. Briefly,  
423 frozen tissue from the basilar part of the pons (1 cm<sup>3</sup>) was homogenized in high salt (HS) buffer  
424 (50 mM Tris-HCl pH 7.5, 750 mM NaCl, 10 mM NaF, 5 mM EDTA) with protease and  
425 phosphatase inhibitors (Roche) and incubated on ice for 20 min. The homogenate was  
426 centrifuged at 100,000 xg for 30 min. The resulting pellet was washed with HS buffer and then  
427 re-extracted sequentially with 1 % Triton X-100 in HS buffer, 1 % Triton X-100 in HS buffer  
428 and 30 % sucrose, 1 % sarkosyl in HS buffer and finally PBS. The incubation with 1% sarkosyl  
429 in HS buffer was performed overnight at 4 °C. The final fraction was sonicated and the presence  
430 of  $\alpha$ -Syn aggregates was confirmed by immunoblotting against phospho S129  $\alpha$ -Syn.

## 431 Cell culture

432 To create a stable cell line expressing EGFP- $\alpha$ -SynA53T, SH-SY5Y cells were transfected using  
433 Lipofectamine 2000 (Thermo Fisher). Cells were cultured in in Dulbecco's modified Eagle's  
434 medium (DMEM, Biochrom) supplemented with 10 % fetal bovine serum (FBS, GIBCO), 2 mM  
435 L-glutamine (GIBCO) and 2,000  $\mu$ g/ml geneticin for selection. Polyclonal cell lines were  
436 generated by fluorescence-activated cell sorting (FACS). Upon selection, cells were cultured in  
437 medium supplemented with 200  $\mu$ g/ml geneticin (Thermo Fisher) and penicillin/streptomycin  
438 (Thermo Fisher).

439 Cells were seeded as described<sup>19</sup> using 300 nM (monomer) of  $\alpha$ -SynA53T PFFs or gold-  
440 conjugated WT  $\alpha$ -Syn PFFs. In brief, sonicated PFFs were diluted in a mixture of 50  $\mu$ l of  
441 Optimem (Biochrom) and 3  $\mu$ l of Lipofectamine 2000. Subsequently the suspension was added  
442 to 1 ml of cell culture medium.

## 443 Lentivirus packaging

444 HEK293T cells (632180, Lenti-X 293T cell line, Takara; RRID: CVCL\_0063) for lentiviral  
445 packaging were expanded to 70-85 % confluency in DMEM Glutamax (+ 4.5 g/L D-Glucose, -  
446 Pyruvate) supplemented with 10 % FBS (Sigma), 1 % G418 (Gibco), 1 % NEAA (Thermo  
447 Fisher), and 1 % HEPES (Biomol). Only low passage cells were used. For lentiviral production, a  
448 three-layered 525cm<sup>2</sup> flask (Falcon) was seeded and cells were henceforth cultured in medium  
449 without G418. On the following day, cells were transfected with the expression plasmid  
450 pFhSynW2 (GFP-SynA53T-Flag, Flag-GFP) or FU3a (p62-tagRFP), and the packaging plasmids  
451 psPAX2 and pVsVg using TransIT-Lenti transfection reagent (Mirus). The transfection mix was  
452 incubated for 20 min at room temperature (RT) and cell medium was exchanged. 10 ml of  
453 transfection mix were added to the flask and incubated overnight. The medium was exchanged  
454 on the next day. After 48-52 h, culture medium containing the viral particles was collected and  
455 centrifuged for 10 min at 1,200 xg. The supernatant was filtered through 0.45  $\mu$ m pore size filters  
456 using 50 ml syringes, and Lenti-X concentrator (Takara) was added. After an overnight  
457 incubation at 4 °C, samples were centrifuged at 1,500 xg for 45 min at 4 °C, the supernatant was  
458 removed, and the virus pellet was resuspended in 600  $\mu$ l TBS-5 buffer (50 mM Tris-HCl, pH 7.8,  
459 130 mM NaCl, 10 mM KCl, 5 mM MgCl<sub>2</sub>). After aliquoting, viruses were stored at -80 °C.

## 460 Primary neurons

461 Primary cortical neurons were prepared from E15.5 CD-1 wild type mouse embryos (breeding  
462 line MpiCrllcr:CD-1). All experiments involving mice were performed in accordance with the  
463 relevant guidelines and regulations. Pregnant females were sacrificed by cervical dislocation, the  
464 uterus was removed from the abdominal cavity and placed into a 10 cm sterile Petri dish on ice  
465 containing dissection medium, consisting of Hanks' balanced salt solution supplemented with  
466 0.01 M HEPES, 0.01 M MgSO<sub>4</sub>, and 1% penicillin/streptomycin. Embryos of both sexes were  
467 chosen randomly. Each embryo was isolated, heads were quickly cut, and brains were removed  
468 from the skull and immersed in ice-cold dissection medium. Cortical hemispheres were dissected  
469 and meninges were removed under a stereo-microscope. Cortical tissue from typically six to  
470 seven embryos was transferred to a 15 ml sterile tube and digested with 0.25 % trypsin  
471 containing 1 mM 2,2',2'',2'''-(ethane-1,2-diylidinitrilo) tetraacetic acid (EDTA) and 15 µl 0.1 %  
472 DNase I for 20 min at 37 °C. The enzymatic digestion was stopped by removing the supernatant  
473 and washing the tissue twice with Neurobasal medium (Invitrogen) containing 5 % FBS. The  
474 tissue was resuspended in 2 ml medium and triturated to achieve a single cell suspension. Cells  
475 were spun at 130 xg, the supernatant was removed, and the cell pellet was resuspended in  
476 Neurobasal medium with 2 % B27 (Invitrogen), 1 % L-glutamine (Invitrogen) and 1 %  
477 penicillin/streptomycin (Invitrogen). For immunostaining, neurons were cultured in 24-well  
478 plates on 13 mm coverslips coated with 1 mg/ml poly-D-lysine (Sigma) and 1 µg/ml laminin  
479 (Thermo Fisher Scientific) (100,000 neurons per well). For MTT assay, neurons were cultured in  
480 96-well plates coated in the same way (19,000 neurons per well). For Cryo-ET, EM grids were  
481 placed in 24-well plates and coated as above (120,000 neurons per well). For lentiviral  
482 transduction at DIV 10, viruses were thawed and immediately added to freshly prepared neuronal  
483 culture medium. Neurons in 24-well plates received 1 µl of virus/well, while neurons in 96 well-  
484 plates received 0.15 µl of virus/well. A fifth of the medium from cultured neurons was removed  
485 and the equivalent volume of virus-containing medium was added. Three days after transduction,  
486 2 µg/ml of seeds ( $\alpha$ -SynA53T PFFs, gold-conjugated WT  $\alpha$ -Syn PFFs or MSA-derived  
487 aggregates) were added to the neuronal culture medium.

## 488 MTT viability assay

489 Viability of transduced neurons was determined using Thiazolyl Blue Tetrazolium Bromide  
490 (MTT; Sigma-Aldrich). Cell medium was exchanged for 100  $\mu$ l of fresh medium, followed by  
491 addition of 20  $\mu$ l of 5 mg/ml MTT in PBS and incubation for 2-4 h at 37 °C, 5 % CO<sub>2</sub>.  
492 Subsequently, 100  $\mu$ l solubilizer solution (10 % SDS, 45 % dimethylformamide in water, pH 4.5)  
493 was added, and on the following day absorbance was measured at 570 nm. Each condition was  
494 measured in triplicates per experiment and absorbance values were averaged for each  
495 experiment. Viability values of neurons seeded with  $\alpha$ -Syn aggregates were normalized to those  
496 of neurons that received PBS only.

## 497 Immunofluorescence

498 Immunofluorescence stainings on SH-SY5Y cells were performed 24 h after seeding. Cells were  
499 fixed for 10 min with 4 % paraformaldehyde (PFA) in PBS and subsequently incubated for 5 min  
500 in permeabilization solution (0.1 % Triton X-100 in PBS) at RT. After blocking with 5 % milk in  
501 permeabilization solution, primary antibodies were diluted in blocking solution and incubated  
502 with the cells over night at 4 °C. Secondary antibodies were incubated with the cells in blocking  
503 solution for 3 h at room temperature. The coverslips were subsequently incubated with 500 nM  
504 DAPI for 10 min and then mounted on glass slides. Images were taken using a CorrSight  
505 microscope (Thermo Fisher) in spinning disc mode with a 63x oil immersion objective.

506 Primary neurons were fixed with 4% PFA in PBS for 20 min; remaining free groups of PFA  
507 were blocked with 50 mM ammonium chloride in PBS for 10 min at RT. Cells were rinsed once  
508 with PBS and permeabilized with 0.25 % Triton X-100 in PBS for 5 min. After washing with  
509 PBS, blocking solution consisting of 2 % BSA (Roth) and 4 % donkey serum (Jackson  
510 ImmunoResearch) in PBS was added for 30 min at RT. Coverslips were transferred to a light  
511 protected humid chamber and incubated with primary antibodies diluted in blocking solution for  
512 1 h. Cells were washed with PBS and incubated with secondary antibodies diluted 1:250 in  
513 blocking solution, with 0.5 mg/ml DAPI added to stain the nuclei. Coverslips were mounted on  
514 Menzer glass slides using Prolong Glass fluorescence mounting medium. Confocal images were  
515 obtained at a SP8 confocal microscope (Leica) using 40x or 63x oil immersion objectives  
516 (Leica). Neurons containing aggregates in the soma were manually quantified using the Cell  
517 Counter plugin of ImageJ<sup>42</sup> (RRID: SCR\_003070).



## 518 Negative stain EM

519 For negative stain analysis, continuous carbon Quantifoil grids (Cu 200 mesh, QuantifoilMicro  
520 Tools) were glow discharged using a plasma cleaner (PDC-3XG, Harrick) for 30 s. Grids were  
521 incubated for 1 min with PFFs, blotted and subsequently washed 2 times with water for 10 s. The  
522 blotted grids were stained with 0.5 % uranyl acetate solution, dried and imaged in Polara cryo-  
523 electron microscope (Thermo Fisher) operated at 300 kV using a pixel size of 2.35 or 3.44 Å.

## 524 Cryo-ET sample preparation

525 Quantifoil grids (R1/4 or 1.2/20, Au mesh grid with SiO<sub>2</sub> film, QuantifoilMicro Tools) were  
526 glow discharged using a plasma cleaner (PDC-3XG, Harrick) for 30 s. Cells were plated on the  
527 grids as described above. SH-SY5Y cells were seeded with  $\alpha$ -Syn aggregates 24 h after plating  
528 and plunge frozen after another 24 h. Neurons were transduced on DIV 10, seeded with  $\alpha$ -Syn  
529 aggregates on DIV 13 and plunge frozen on DIV 20. Plunge freezing was performed on a  
530 Vitrobot (Thermo Fisher) with the following settings: temperature, 37 °C; humidity, 80 %; blot  
531 force, 10; blot time, 10 s. The grids were blotted from the back and the front using Whatman  
532 filter paper and plunged into a liquid ethane/propane mixture. Subsequently the vitrified samples  
533 were transferred into cryo-EM boxes and stored in liquid nitrogen.

## 534 Correlative cryo-light microscopy and cryo-FIB milling

535 Grids were mounted onto autogrid sample carriers (Thermo Fisher) that contain cut-out regions  
536 to facilitate shallow-angle FIB milling. Subsequently grids were transferred into the stage of a  
537 CorrSight cryo-light microscope (Thermo Fisher) cooled at liquid nitrogen temperature.  
538 Overview images of the grids were acquired using a 20x lens (air, N.A., 0.8). Cells containing  
539 fluorescence signal of interest (GFP- $\alpha$ -Syn or p62-RFP) were mapped using MAPS software 2.1  
540 (Thermo Fisher; RRID: SCR\_018738).

541 The samples were transferred into a Scios or Quanta dual beam cryo-FIB/scanning electron  
542 microscopes (SEM; Thermo Fisher). To avoid charging of the samples, a layer of inorganic  
543 platinum was deposited on the grids. That was followed by the deposition of organometallic  
544 platinum using an *in situ* gas injection system (working distance - 10 mm, heating - 27 °C, time -  
545 8 s) to avoid damaging the cells by out-of-focus gallium ions. Subsequently 2D-correlation was

546 performed using MAPS and the 3-point alignment method between the fluorescence and the  
547 SEM image as described<sup>17</sup>.

548 For FIB milling, the grid was tilted to 18° and gallium ions at 30 kV were used to remove excess  
549 material from above and below the region of interest. Rough milling was conducted at a current  
550 of 0.5 nA and fine milling at a current of 50 pA, resulting in 100-200 nm thick lamellas.

### 551 Cryo-ET data collection and reconstruction

552 The lamellas were transferred into a Titan Krios cryo-electron microscope (Thermo Fisher)  
553 operated at 300 kV and subsequently loaded onto a compustage cooled to liquid nitrogen  
554 temperatures. Lamellas were oriented perpendicular to the tilt axis. Images were collected using  
555 a 4 k x 4 k K2 Summit or K3 (Gatan) direct detector cameras operated in dose fractionation  
556 mode (0.2 s, 0.15 e<sup>-</sup>/Å<sup>2</sup>). A BioQuantum (Gatan) post column energy filter was used with a slit  
557 width of 20 eV. Tilt series were recorded using SerialEM<sup>43</sup> (RRID: SCR\_017293) at pixel size of  
558 3.52 or 4.39 Å. Tilt series were recorded dose-symmetrically<sup>44</sup> from -50° to +60° with an angular  
559 increment of 2°, resulting in a total dose of 100-130 e<sup>-</sup>/Å<sup>2</sup> per tilt series. Frames were aligned  
560 using Motioncor2<sup>45</sup>. Final tilt series were aligned using fiducial-less patch tracking and  
561 tomograms were reconstructed by using back projection in IMOD<sup>46</sup> (RRID: SCR\_003297).  
562 Contrast was enhanced by filtering the tomograms using tom\_deconv  
563 ([https://github.com/dtegunov/tom\\_deconv](https://github.com/dtegunov/tom_deconv)) within MATLAB (MathWorks).

### 564 Tomogram segmentation

565 The membranes of the tomograms were segmented using the automatic membrane tracing  
566 package TomoSegMemTV<sup>47</sup>. The results were refined manually in Amira (FEI Visualization  
567 Science Group; RRID: SCR\_014305). The lumen of organelles was filled manually based on the  
568 membrane segmentations. For tracing of α-Syn fibrils, the XTracing module<sup>48</sup> of Amira was  
569 used. For that the tomograms were first denoised with a non-local means filter, and subsequently  
570 searched with a cylindrical template of 10 nm diameter and 80 nm length. Based on the cross-  
571 correlation fields, thresholds producing an optimal balance of true positives and negatives were  
572 applied. Filaments were subsequently traced with a search cone of 50 nm length and an angle of  
573 37°. The direction coefficient was 0.3 and the minimum filament length was set to 100 nm.  
574 Selected filaments were inspected visually.

## 575 Tomogram analysis

### 576 *Cytosolic fibril density*

577 The density of fibrils within the inclusion was calculated as the fraction of cytosolic volume  
578 occupied by fibrils. Cellular volume was calculated multiplying the X and Y dimensions of the  
579 tomogram by the thickness of the lamella along the Z direction. To calculate cytoplasmic  
580 volume, the lumina of organelles were subtracted from the tomogram volume. Fibril volume was  
581 calculated approximating fibrils by cylinders with radius of 5 nm and the length calculated by  
582 filament tracing. Calculations were performed in MATLAB.

### 583 *Fibril persistence length*

584 The persistence length ( $L_p$ ) measures the stiffness of polymers as the average distance for which  
585 a fibril is not bent. It was calculated using an in-house script as previously described<sup>16</sup> executed  
586 in MATLAB. Briefly,  $L_p$  is calculated as the expectation value of  $\cos \theta$ , where  $\theta$  is defined as the  
587 angle between two tangents to the fibril at positions 0 and  $l$ <sup>49</sup>:

$$588 \quad \langle \cos(\theta_0 - \theta_l) \rangle = e^{-(l/L_p)}$$

589 The Young's modulus (E) can be calculated from  $L_p$  as:

$$590 \quad E = \frac{L_p k_B T}{I}$$

591 where  $k_B$  is the Boltzmann constant ( $1.38 \times 10^{-23} \text{ m}^2 \text{ kg s}^{-2} \text{ K}^{-1}$ ), T is the absolute temperature  
592 (here 295 K) and I is the momentum of inertia. Approximating the fibril by a solid rod, I can be  
593 calculated from its radius r as:

$$594 \quad I = \frac{\pi r^4}{4}$$

595 Here we used  $r = 5 \text{ nm}$ .

### 596 *Fibril-membrane distance*

597 Fibril-membrane nearest distance was defined for each point on the fibril as the minimum  
598 Euclidean distance to another point on a membrane. The algorithm computing fibril-membrane  
599 nearest distances can be summarized as follows:

- 600 • For each tomogram:

- 601       ◦ Use the segmentation of organelle lumina to compute the distance transform tomogram<sup>50</sup>,  
602       which calculates the Euclidean distance from each background voxel to the nearest  
603       segmented one.
- 604       ◦ For each fibril:
- 605           ▪ The curve defined by Amira's Xtracing module during segmentation is sampled  
606           uniformly each 5 nm (i.e. similar to the fibril radius).
  - 607           ▪ For each point in the fibril:
    - 608               • To achieve subvoxel precision, get the interpolated value of the distance  
609               transform tomogram at the coordinates of that point.
    - 610               • Add this value to a list of fibril-membrane nearest distances.

611 The probability density was computed as the normalized histogram of the list of fibril-membrane  
612 nearest distances.

613 To test whether these fibril-membrane nearest distances resulted from random or specific  
614 interactions, we compared the experimentally determined distances with those of simulated  
615 fibrils. These simulated fibrils were created by randomly shifting and rotating the experimentally  
616 measured fibrils as follows:

- 617   • For each tomogram:
  - 618       ◦ Generate 200 synthetic tomograms:
    - 619           ▪ Take randomly an input experimental fibril as reference.
    - 620           ▪ Shift the reference fiber in respect to its center at a random distance in a range of [10,  
621           20] nm.
    - 622           ▪ Rotate the fibril randomly with respect to the fibril center with Euler angles selected  
623           randomly in the range of [0, 10] degrees.
    - 624           ▪ Try to insert the resulting fibril in the synthetic tomogram. The insertion fails in the  
625           following cases:
      - 626               • The fibril intersects with another one, considering that fibrils have a cross-section  
627               radius of 5 nm.
      - 628               • The fibril intersects with a segmented membrane.
      - 629               • Part of the fibril is out of the tomogram boundaries.
    - 630           ▪ Iterate until 50 fibrils are inserted or 5000 tries are reached.

### 631 *Inter-membrane distance*

632 Each segmented lumen was labeled differently to identify different organelles. The inter-  
633 membrane nearest distance for a point on a membrane was defined as the minimum Euclidean  
634 distance to another point on a membrane associated to a different lumen. The algorithm for  
635 computing inter-membrane nearest distances can be summarized as follows:

- 636 • For each tomogram:
  - 637 ◦ Assign labels for the lumen of each organelle.
  - 638 ◦ Associate segmented membranes and lumina by a proximity criterion. For each voxel  
639 in a membrane segmentation, the label of the nearest lumen voxel is determined. The  
640 lumen is then associated to the membrane segmentation most frequently found.
  - 641 ◦ For each lumen:
    - 642 ▪ Compute the distance transform tomogram<sup>50</sup> from all lumina.
    - 643 ▪ Erase the current lumen.
    - 644 ▪ For each pixel on the membrane segmentation associated to the current lumen:
      - 645 • Get the interpolated value of the distance transform tomogram at the  
646 coordinates of that point.
      - 647 • Add this value to a list of inter-membrane nearest distances.

648 Probability densities were computed as described for fibril-membrane nearest distances.

### 649 *Statistical analysis*

650 For the quantification of the percentage of neurons with aggregates using light microscopy  
651 (Extended Data Fig. 1e), N = 4 (GFP- $\alpha$ -Syn + PFFs) and 3 (endogenous  $\alpha$ -Syn + PFFs)  
652 independent experiments were performed, and a total of 100-500 neurons per condition and per  
653 experiment were counted. Statistical analysis was carried out by two-tailed unpaired t-test with  
654 Welch's correction in Prism 6 (GraphPad; RRID: SCR\_002798).

655 For the quantification of neuronal viability using the MTT assay (Extended Data Fig. 1f), N = 3  
656 independent experiments were performed for all conditions. Untransduced and unseeded control  
657 cells were used as reference. Statistical analysis was carried out by two-way ANOVA and  
658 Dunnett's multiple comparison test in Prism 6.

659 The number of tomograms and fibrils, as well as the total membrane area analyzed for each  
660 condition are shown in Extended Data Table 1.

661 Statistical analysis of cytosolic fibril density (Fig. 2e) was carried out by one-way ANOVA.

662 Confidence intervals for fibril-membrane (Fig. 4b) and inter-membrane (Fig. 4b) distances were  
663 calculated as the 5-95 percentiles from the curves of each individual tomogram. The differences  
664 between the curves within 20 nm were statistically analyzed by Kolmogorov-Smirnov test.

665 Additional information on statistical analyses can be found in the Source Data files.

### 666 Data and code availability

667 All data supporting the findings of this study are available within this paper. Source Data for Fig.  
668 2d, e, Fig. 4b, c, Extended Data Fig. 1e, f, Extended Data Fig. 4, FACS (Supplementary Fig. 1)  
669 and gel source images (Supplementary Fig. 2) are available with the online version of this paper.  
670 The tomograms shown in Fig. 1 and Fig. 2 are available in EMPIAR through accession codes  
671 EMD-11401 (Fig. 1a), EMD-11417 (Fig. 1e) and EMD-11416 (Fig. 2a).

672 The tomogram deconvolution filter is available at: [https://github.com/dtegunov/tom\\_deconv](https://github.com/dtegunov/tom_deconv).

673 The script for the calculation of  $L_p$  is available at: <https://github.com/FJBauerlein/Huntington>.

674 The scripts for fibril-membrane and inter-membrane distance calculations were performed within  
675 the PySeg software<sup>51</sup> and are available at:

676 [https://github.com/anmartinezs/pyseg\\_system/tree/master/code/pyorg/scripts/filaments](https://github.com/anmartinezs/pyseg_system/tree/master/code/pyorg/scripts/filaments).

677

## 678 Methods references

- 679 36 Paleologou, K. E. *et al.* Phosphorylation at Ser-129 but not the phosphomimics S129E/D  
680 inhibits the fibrillation of alpha-synuclein. *J. Biol. Chem.* **283**, 16895-16905,  
681 doi:10.1074/jbc.M800747200 (2008).
- 682 37 Rospigliosi, C. C. *et al.* E46K Parkinson's-linked mutation enhances C-terminal-to-N-  
683 terminal contacts in alpha-synuclein. *J. Mol. Biol.* **388**, 1022-1032,  
684 doi:10.1016/j.jmb.2009.03.065 (2009).
- 685 38 Furlong, R. A., Narain, Y., Rankin, J., Wyttenbach, A. & Rubinsztein, D. C. Alpha-  
686 synuclein overexpression promotes aggregation of mutant huntingtin. *Biochem. J.* **346 Pt**  
687 **3**, 577-581, doi:10.1042/bj3460577 (2000).
- 688 39 May, S. *et al.* C9orf72 FTL/ALS-associated Gly-Ala dipeptide repeat proteins cause  
689 neuronal toxicity and Unc119 sequestration. *Acta Neuropathol* **128**, 485-503,  
690 doi:10.1007/s00401-014-1329-4 (2014).
- 691 40 Kuhn, P. H. *et al.* ADAM10 is the physiologically relevant, constitutive alpha-secretase  
692 of the amyloid precursor protein in primary neurons. *EMBO J.* **29**, 3020-3032,  
693 doi:10.1038/emboj.2010.167 (2010).
- 694 41 Peng, C. *et al.* Cellular milieu imparts distinct pathological alpha-synuclein strains in  
695 alpha-synucleinopathies. *Nature* **557**, 558-563, doi:10.1038/s41586-018-0104-4 (2018).
- 696 42 Schneider, C. A., Rasband, W. S. & Eliceiri, K. W. NIH Image to ImageJ: 25 years of  
697 image analysis. *Nat. Methods* **9**, 671-675, doi:10.1038/nmeth.2089 (2012).
- 698 43 Mastronarde, D. N. Automated electron microscope tomography using robust prediction  
699 of specimen movements. *J Struct Biol* **152**, 36-51, doi:10.1016/j.jsb.2005.07.007 (2005).
- 700 44 Hagen, W. J. H., Wan, W. & Briggs, J. A. G. Implementation of a cryo-electron  
701 tomography tilt-scheme optimized for high resolution subtomogram averaging. *J Struct*  
702 *Biol* **197**, 191-198, doi:10.1016/j.jsb.2016.06.007 (2017).
- 703 45 Zheng, S. Q. *et al.* MotionCor2: anisotropic correction of beam-induced motion for  
704 improved cryo-electron microscopy. *Nat. Methods* **14**, 331-332, doi:10.1038/nmeth.4193  
705 (2017).
- 706 46 Kremer, J. R., Mastronarde, D. N. & McIntosh, J. R. Computer visualization of three-  
707 dimensional image data using IMOD. *J Struct Biol* **116**, 71-76,  
708 doi:10.1006/jsbi.1996.0013 (1996).
- 709 47 Martinez-Sanchez, A., Garcia, I., Asano, S., Lucic, V. & Fernandez, J. J. Robust  
710 membrane detection based on tensor voting for electron tomography. *J Struct Biol* **186**,  
711 49-61, doi:10.1016/j.jsb.2014.02.015 (2014).
- 712 48 Rigort, A. *et al.* Automated segmentation of electron tomograms for a quantitative  
713 description of actin filament networks. *J Struct Biol* **177**, 135-144,  
714 doi:10.1016/j.jsb.2011.08.012 (2012).
- 715 49 Nagashima, H. & Asakura, S. Dark-field light microscopic study of the flexibility of F-  
716 actin complexes. *J. Mol. Biol.* **136**, 169-182, doi:10.1016/0022-2836(80)90311-3 (1980).
- 717 50 van der Walt, S., Colbert, S. C. & Varoquaux, G. The NumPy Array: A Structure for  
718 Efficient Numerical Computation. *Computing in Science & Engineering* **13**, 22-30,  
719 doi:10.1109/mcse.2011.37 (2011).
- 720 51 Martinez-Sanchez, A. *et al.* Template-free detection and classification of membrane-  
721 bound complexes in cryo-electron tomograms. *Nat. Methods* **17**, 209-216,  
722 doi:10.1038/s41592-019-0675-5 (2020).

## 723 Acknowledgments

724 We thank Philipp Erdmann, Günter Pfeifer, Jürgen Plitzko and Miroslava Schaffer for electron  
725 microscopy support, Ana Jungclaus and Nadine Wischnewski for wet lab support. We thank  
726 Dieter Edbauer, Hilal Lashuel, David Rubinsztein and Didier Trono for sharing plasmids. We  
727 thank Konstanze Winklhofer and Joerg Tazelt for sharing the SH-SY5Y cell line and helpful  
728 discussions. We are also grateful to Sophie Keeling for help in plasmid cloning, Javier Collado  
729 for help with sample preparation, Jonathan Schneider for help with image processing, Patrick  
730 Auer for help in aggregate quantification, as well as Itika Saha, Eri Sakata and Patricia Yuste-  
731 Checa for helpful discussions. Finally, we thank the anonymous MSA patient and his family for  
732 the donation of brain tissue to the Neurobiobank Munich. Fluorescence-activated cell sorting was  
733 carried out at the Imaging Facility of the Max Planck Institute of Biochemistry. V.A.T. was  
734 supported by the Graduate School of Quantitative Biosciences Munich. V.A.T., I.R.-T., A.M.-S.,  
735 F.J.B., Q.G., W.B., I.D., M.S.H., F.U.H. and R.F.-B. have received funding from the European  
736 Commission (FP7 GA ERC-2012-SyG\_318987-ToPAG). I.D. acknowledges financial support  
737 from the Horst Kübler-Stiftung. V.A.T., T.A., M.S.H., F.U.H. and R.F.-B. acknowledge funding  
738 from the Deutsche Forschungsgemeinschaft (DFG, German Research Foundation) through  
739 Germany's Excellence Strategy - EXC 2067/1- 390729940 (R.F.-B.) and EXC 2145 –  
740 390857198 (V.A.T., T.A., M.S.H. and F.U.H).

## 741 Author contributions

742 V.A.T. performed biochemical and electron microscopy experiments, immunofluorescence  
743 imaging of SH-SY5Y cells and contributed to computational data analysis. I.R.-T. produced  
744 lentivirus and neuronal cultures, and performed viability assays and immunofluorescence  
745 imaging of neurons. A.M.S. developed software procedures for data analysis. F.B. and Q.G.  
746 contributed to data analysis. T.A. collected the autopsy case, characterized it neuropathologically  
747 and performed immunohistochemistry. V.A.T., I.R.-T., W.B., I.D., M.S.H., F.U.H. and R.F.-B.  
748 planned research. I.D. supervised neuronal culture experiments. M.S.H. and F.U.H. supervised  
749 biochemical experiments. R.F.-B. supervised electron microscopy experiments and data analysis.  
750 R.F.-B. wrote the manuscript with contributions from all authors.

## 751 Competing interests

752 The authors declare no competing interests.



753 **Additional information**

754 Supplementary Information is available for this paper. Correspondence and requests for materials  
755 should be addressed to F.U.H. ([uhartl@biochem.mpg.de](mailto:uhartl@biochem.mpg.de)) and R.F.-B.  
756 ([ruben.fernandezbusnadiego@med.uni-goettingen.de](mailto:ruben.fernandezbusnadiego@med.uni-goettingen.de)).

757



759 [Extended data](#)

760 **Extended Data Table 1 | Statistics of cryo-ET experiments on mouse neurons.**

761

| Condition                       | Experiments | Analyzed tomograms | Analyzed filaments | Analyzed membrane area ( $\mu\text{m}^2$ ) |
|---------------------------------|-------------|--------------------|--------------------|--------------------------------------------|
| GFP- $\alpha$ -syn + PFFs       | 3           | 5                  | 1471               | 3.83                                       |
| Endogenous $\alpha$ -syn + PFFs | 3           | 4                  | 220                | 2.75                                       |
| GFP- $\alpha$ -syn + MSA        | 3           | 5                  | 721                | 3.70                                       |
| Untransduced - PFFs             | 2           | 5                  | -                  | 3.69                                       |

762

763 Neurons were either transduced with GFP- $\alpha$ -syn and seeded with PFFs (“GFP- $\alpha$ -syn + PFFs”),  
764 transduced with p62-RFP and seeded with PFFs (“Endogenous  $\alpha$ -syn + PFFs”), transduced with  
765 GFP- $\alpha$ -syn and seeded with aggregates derived from an MSA patient brain (“GFP- $\alpha$ -syn +  
766 MSA”), or untransduced and unseeded as control (“Untransduced - PFFs”). The column  
767 “Experiments” lists biologically independent replicates. “Analyzed filaments” includes all  
768 filaments analyzed in Fig. 2d, e, Fig. 4 and Extended Data Fig. 7d. “Analyzed membrane area”  
769 includes all membranes analyzed in Fig. 4 and Extended Data Fig. 7e.

770

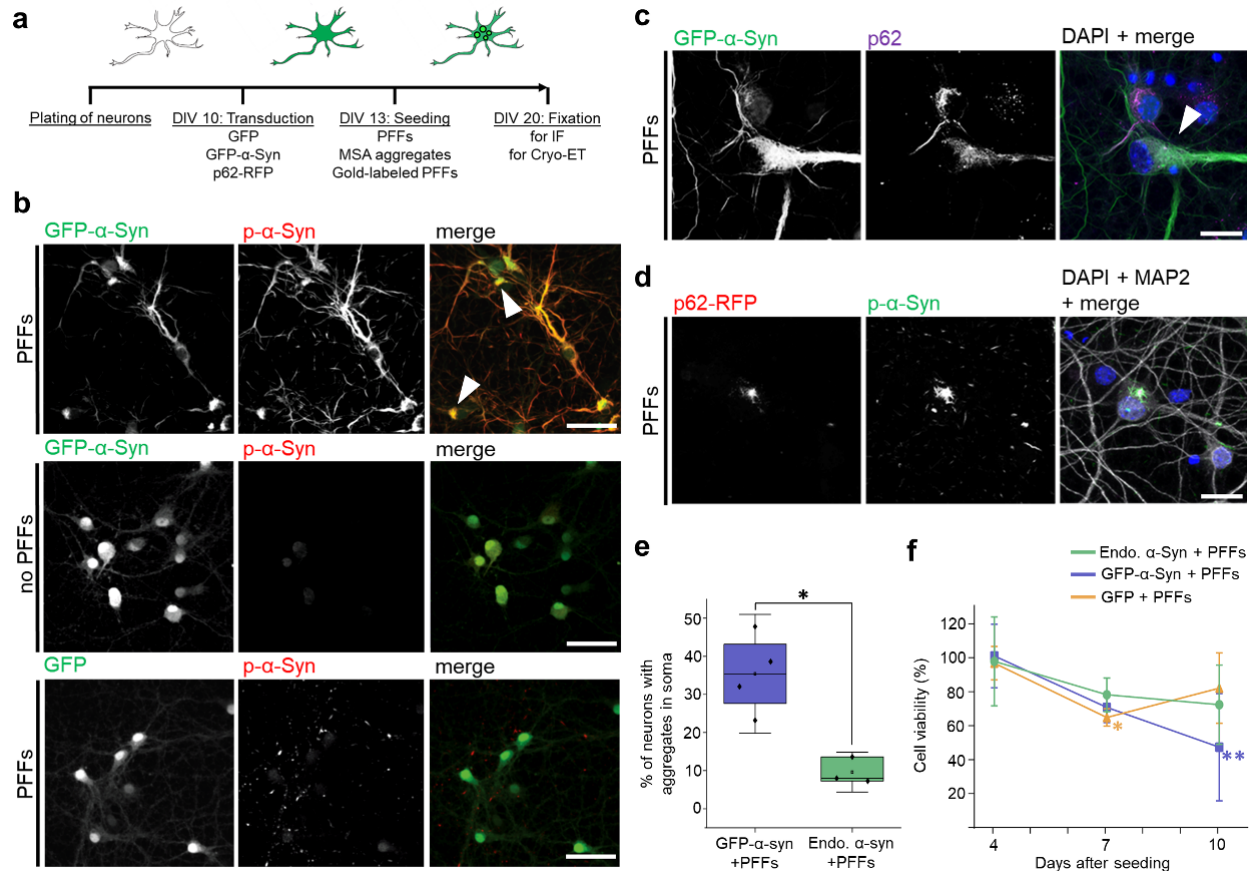

771

772 **Extended Data Fig. 1 | Seeding of  $\alpha$ -Syn aggregates in neurons.** **a**, Schematic of the seeding  
773 of  $\alpha$ -Syn aggregates in primary neurons. Primary mouse neurons were cultivated and transduced  
774 at day *in vitro* (DIV) 10 with GFP, GFP- $\alpha$ -Syn or p62-RFP. Seeds (PFFs or MSA brain-derived)  
775 were applied at DIV 13, and  $\alpha$ -Syn inclusions were studied at DIV 20 by light microscopy or  
776 cryo-ET upon chemical or cryo-fixation, respectively. For light microscopy imaging, GFP signal  
777 was enhanced by staining with an antibody against GFP. **b**, Immunofluorescence imaging of  $\alpha$ -  
778 Syn aggregates, as detected by an antibody against phosphorylated  $\alpha$ -Syn Ser129 (p- $\alpha$ -Syn). Top:  
779 aggregate formation (arrowheads) upon seeding cells expressing GFP- $\alpha$ -Syn with exogenous  
780 PFFs. Middle: no aggregate formation in cells expressing GFP- $\alpha$ -Syn in the absence of PFFs.  
781 Bottom: PFFs seed smaller aggregates in cells with endogenous  $\alpha$ -Syn levels that express GFP  
782 only as control (see Extended Data Fig. 1e for quantification). Scale bars: 50  $\mu$ m. **c**,  
783 Immunofluorescence imaging of GFP- $\alpha$ -Syn aggregates detected by an antibody against p62.  
784 The merged image shows a superposition of the GFP- $\alpha$ -Syn (green), p62 (magenta) and DAPI  
785 (blue) channels. An arrowhead indicates the colocalization of GFP- $\alpha$ -Syn and p62. Scale bar: 20

786  $\mu\text{m}$ . **d**, Immunofluorescence imaging of endogenous  $\alpha$ -Syn aggregates positive for p- $\alpha$ -Syn  
787 colocalizing with p62-RFP. The merged image shows a superposition of the p62-RFP (red),  
788 phospho- $\alpha$ -Syn (green), the neuronal marker MAP2 (grey) and DAPI (blue) channels. Scale bar:  
789 20  $\mu\text{m}$ . **e**, Quantification of the percentage of neurons with aggregates in the soma upon  
790 treatment with PFFs of cells transduced with GFP- $\alpha$ -Syn (blue) or untransduced (green;  
791 endogenous  $\alpha$ -Syn). The horizontal lines of each box represent 75% (top), 50% (middle) and  
792 25% (bottom) of the values, and a black square the average value. Whiskers represent standard  
793 deviation and black diamonds the individual data points. \* indicates  $p = 0.011$  by two-tailed  
794 unpaired t-test with Welch's correction,  $N = 4$  (GFP- $\alpha$ -Syn + PFFs) and 3 (endogenous  $\alpha$ -Syn +  
795 PFFs) independent experiments. **f**, Quantification of neuronal viability upon seeding with PFFs  
796 for cells expressing endogenous  $\alpha$ -Syn (Endo.  $\alpha$ -Syn + PFFs), or transduced with GFP- $\alpha$ -Syn  
797 (GFP- $\alpha$ -Syn + PFFs) or with GFP only (GFP + PFFs) relative to untransduced and unseeded  
798 control cells. Points represent average values and the error bars the standard deviation. \*and \*\*  
799 respectively indicate  $p = 0.04$  and  $p = 0.002$  by two-way ANOVA and Dunnett's multiple  
800 comparison test,  $N = 3$  independent experiments for all conditions.

801

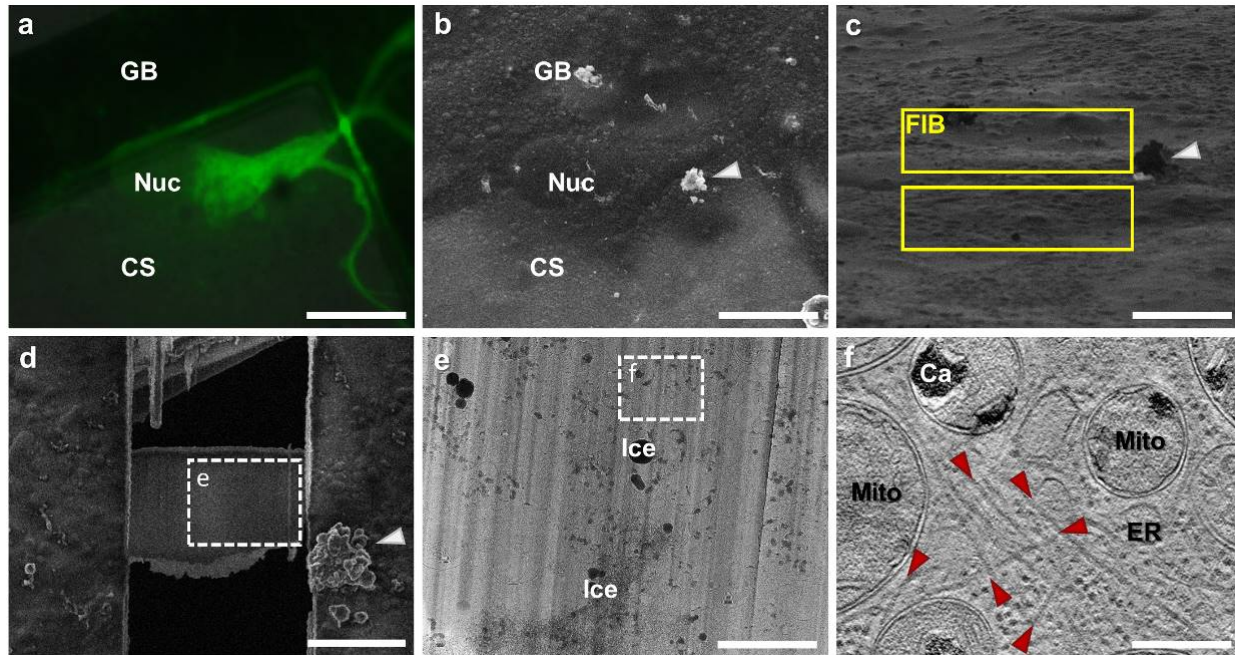

802

803

804 **Extended Data Fig. 2 | Cryo-ET workflow. a**, Cryo-light microscopy imaging of GFP  
805 fluorescence in a primary neuron grown on the carbon support (CS) of an EM grid. The cell was  
806 transduced with GFP- $\alpha$ -Syn at DIV 10 and aggregate formation was seeded by PFFs at DIV 13.  
807 The grid was vitrified at DIV 20. GB: grid bar, Nuc: nucleus. Scale bar: 35  $\mu$ m. **b**, Correlative  
808 scanning electron microscopy imaging of the same cell within the cryo-FIB instrument upon  
809 coordinate transformation. A white arrowhead marks a piece of ice crystal contamination that  
810 can also be found in panels **c** and **d** as visual reference. Scale bar: 35  $\mu$ m. **c**, FIB-induced  
811 secondary electron image of the same cell. Yellow boxes indicate the regions to be milled away  
812 by the FIB during lamella preparation. Scale bar: 20  $\mu$ m. **d**, Scanning electron microscopy  
813 imaging of the same cell upon preparation of a 150 nm-thick electron transparent lamella. The  
814 white square marks the region of the lamella shown in **e**. Scale bar: 15  $\mu$ m. **e**, Low magnification  
815 transmission electron microscopy image of the area of the lamella marked in **d**. Ice: ice crystal  
816 contamination on the lamella surface. The white square marks the region shown in **f**. Scale bar: 3  
817  $\mu$ m. **f**, A tomographic slice (thickness 1.4 nm) recorded in the area indicated in **e**. Ca:  
818 mitochondrial calcium stores, ER: endoplasmic reticulum, Mito: mitochondrion. Red arrowheads  
819 indicate  $\alpha$ -Syn fibrils. Scale bar: 300 nm.

820

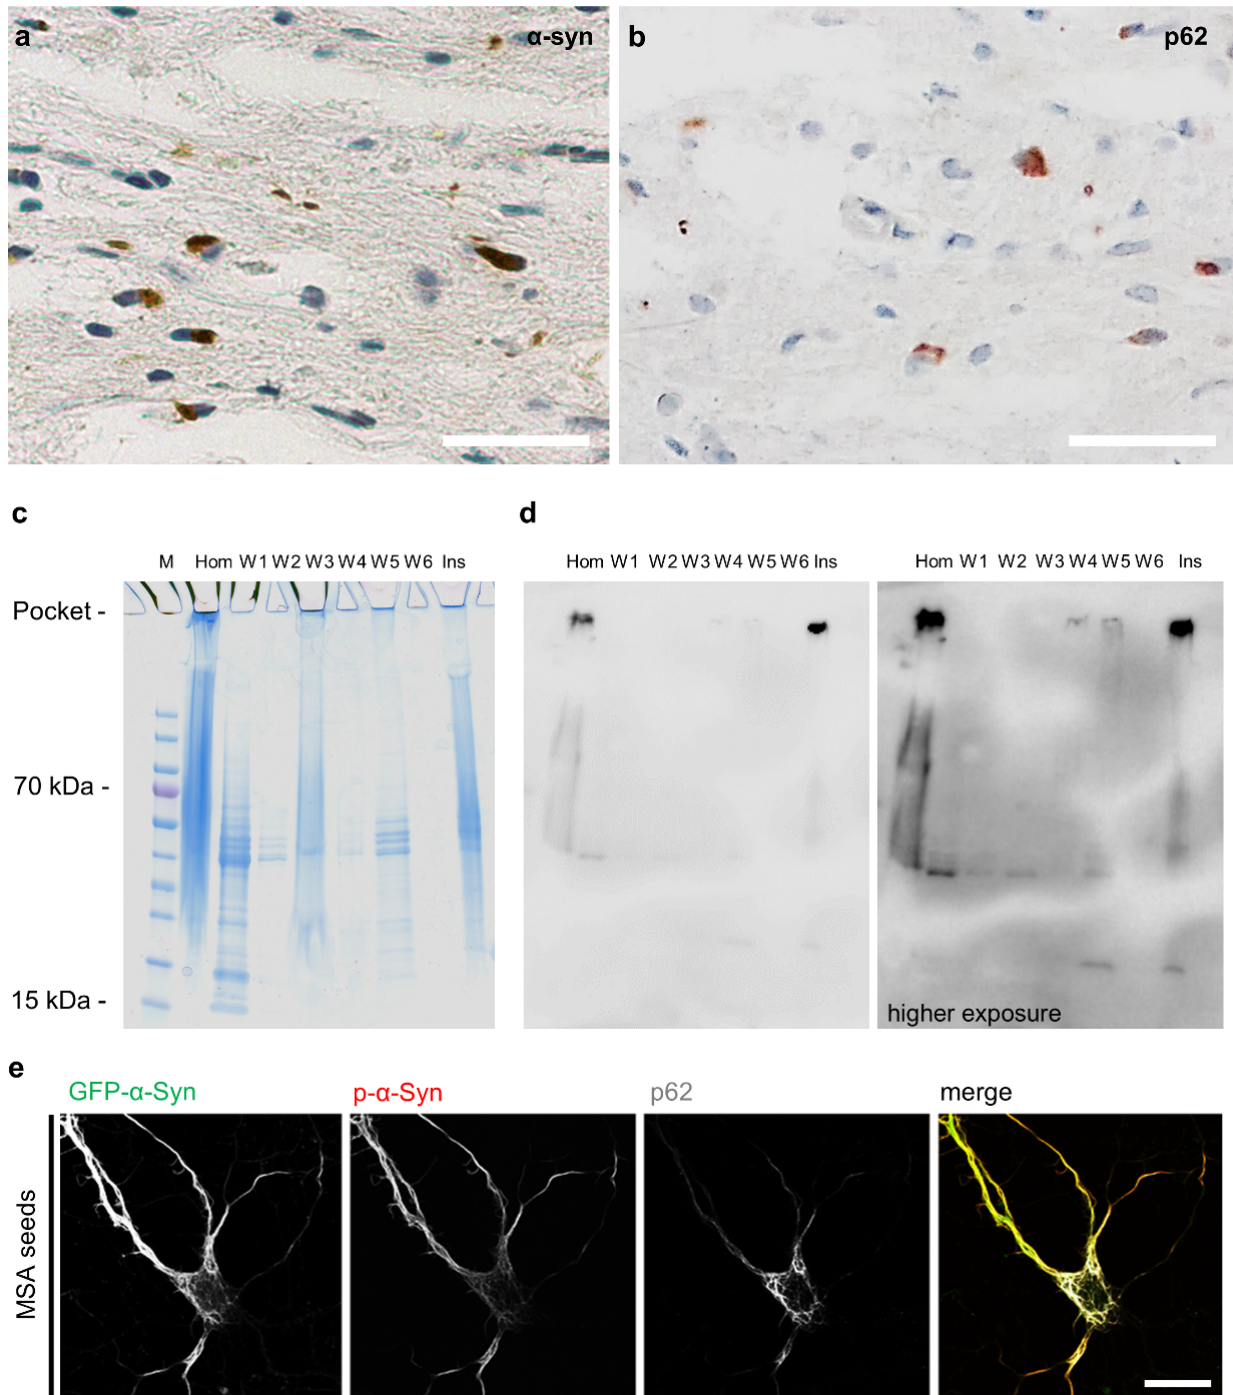

821

822

823 **Extended Data Fig. 3 | Purification of  $\alpha$ -Syn aggregates from MSA patient brain.**

824 **a, b**, Immunohistochemistry staining showing cytoplasmic inclusions (brown) positive for  $\alpha$ -Syn

825 **(a)** and p62 **(b)** in the basilar part of the pons of the brain of an MSA patient. Aggregates for

826 seeding neurons for cryo-ET imaging were purified from the same region **(c, d)**. Scale bars: 50

827  $\mu\text{m}$ . **c, d**, Purification of  $\alpha$ -Syn aggregates from the MSA patient brain shown in **a, b**. Coomassie  
828 staining (**c**) and anti-phospho- $\alpha$ -Syn western blot (**d**) of SDS PAGE gels loaded with brain  
829 homogenate (Hom), washing fractions (W1-6) and the final sarkosyl-insoluble fraction (Ins) at  
830 low (left) and high (right) exposure levels. M: molecular weight marker. Note the aggregated  
831 material in the stacking gel. For gel source images, see Supplementary Fig. 2. **e**,  
832 Immunofluorescence images of a GFP- $\alpha$ -Syn-expressing neuron seeded with the sarkosyl-  
833 insoluble fraction from MSA patient brain, showing aggregates positive for phospho- $\alpha$ -Syn and  
834 p62. GFP signal was enhanced by staining with an antibody against GFP. The merged image  
835 shows a superposition of the GFP- $\alpha$ -Syn (green), phospho- $\alpha$ -Syn (red) and p62 (grey) channels.  
836 Scale bar: 20  $\mu\text{m}$ .  
837



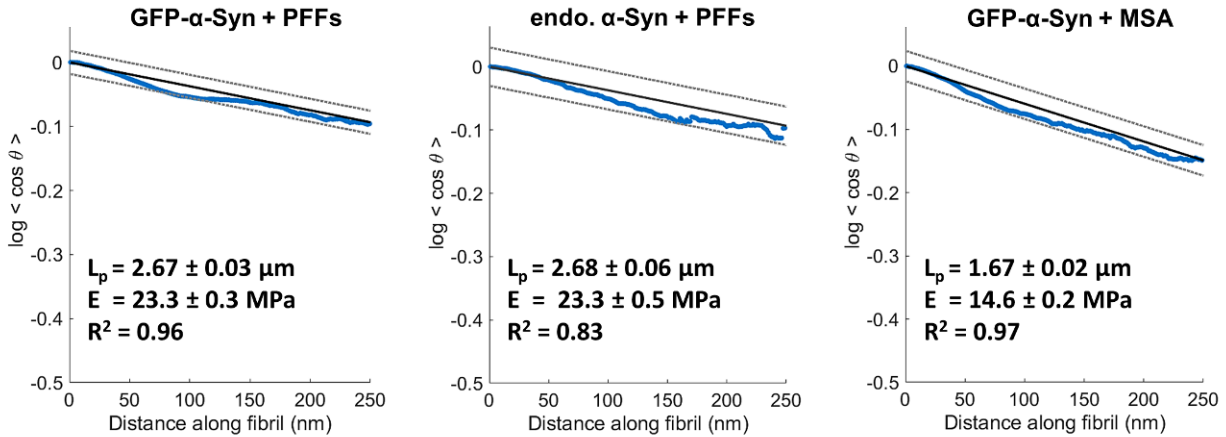

838

839

840 **Extended Data Fig. 4 | Persistence length of  $\alpha$ -Syn fibrils.** Linear fit of the total persistence  
841 length for all fibrils analyzed (N = 1295 (GFP- $\alpha$ -Syn + PFFs), 220 (endogenous  $\alpha$ -Syn + PFFs)  
842 and 721 (GFP- $\alpha$ -Syn + MSA) fibrils in total). The blue curves represent the original data. 95%  
843 confidence interval (dotted lines) and the values of the persistence length ( $L_p$ ), Young's modulus  
844 ( $E$ ) and coefficients of determination ( $R^2$ ) are indicated. Note that the values are almost identical  
845 for GFP- $\alpha$ -Syn and endogenous  $\alpha$ -Syn seeded with PFFs, but lower for GFP- $\alpha$ -Syn seeded with  
846 MSA patient aggregates.

847

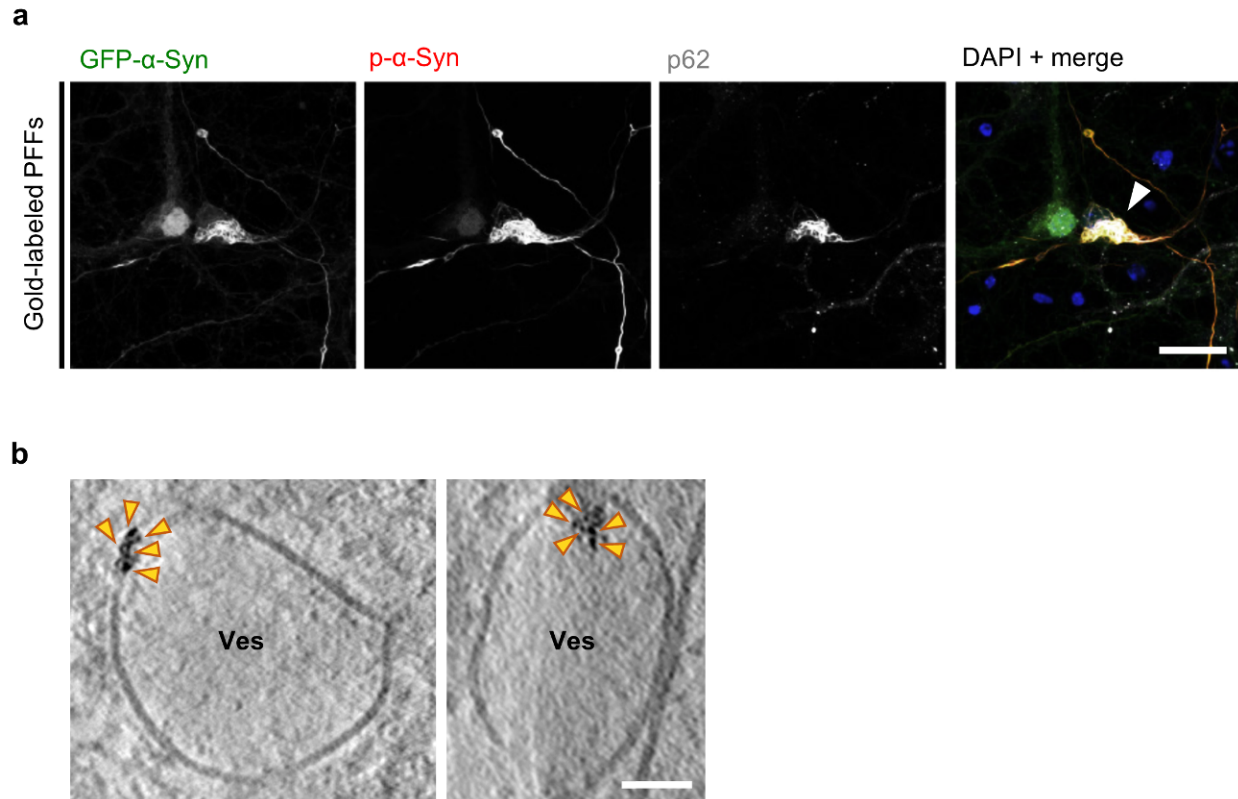

848

849

850 **Extended Data Fig. 5 | Seeding of  $\alpha$ -Syn aggregates in neurons by gold-labeled PFFs. a,**  
851 Immunofluorescence images of a GFP- $\alpha$ -Syn-expressing neuron seeded with gold-labeled PFFs.  
852 The cells develop  $\alpha$ -Syn aggregates, as detected by antibodies against phosphorylated  $\alpha$ -Syn  
853 Ser129 and p62. GFP signal was enhanced by staining with an antibody against GFP. The  
854 merged image shows a superposition of the GFP- $\alpha$ -Syn (green), phospho- $\alpha$ -Syn (red), p62 (grey)  
855 and DAPI (blue) channels. An arrowhead indicates the GFP- $\alpha$ -Syn aggregates. Scale bar: 20  $\mu$ m.  
856 **b,** Tomographic slices (thickness 1.4 nm) showing accumulations of gold particles (orange  
857 arrowheads) at the membrane (left) or in the lumen (right) of intracellular vesicles. Ves: vesicles.  
858 Scale bar: 50 nm.

859

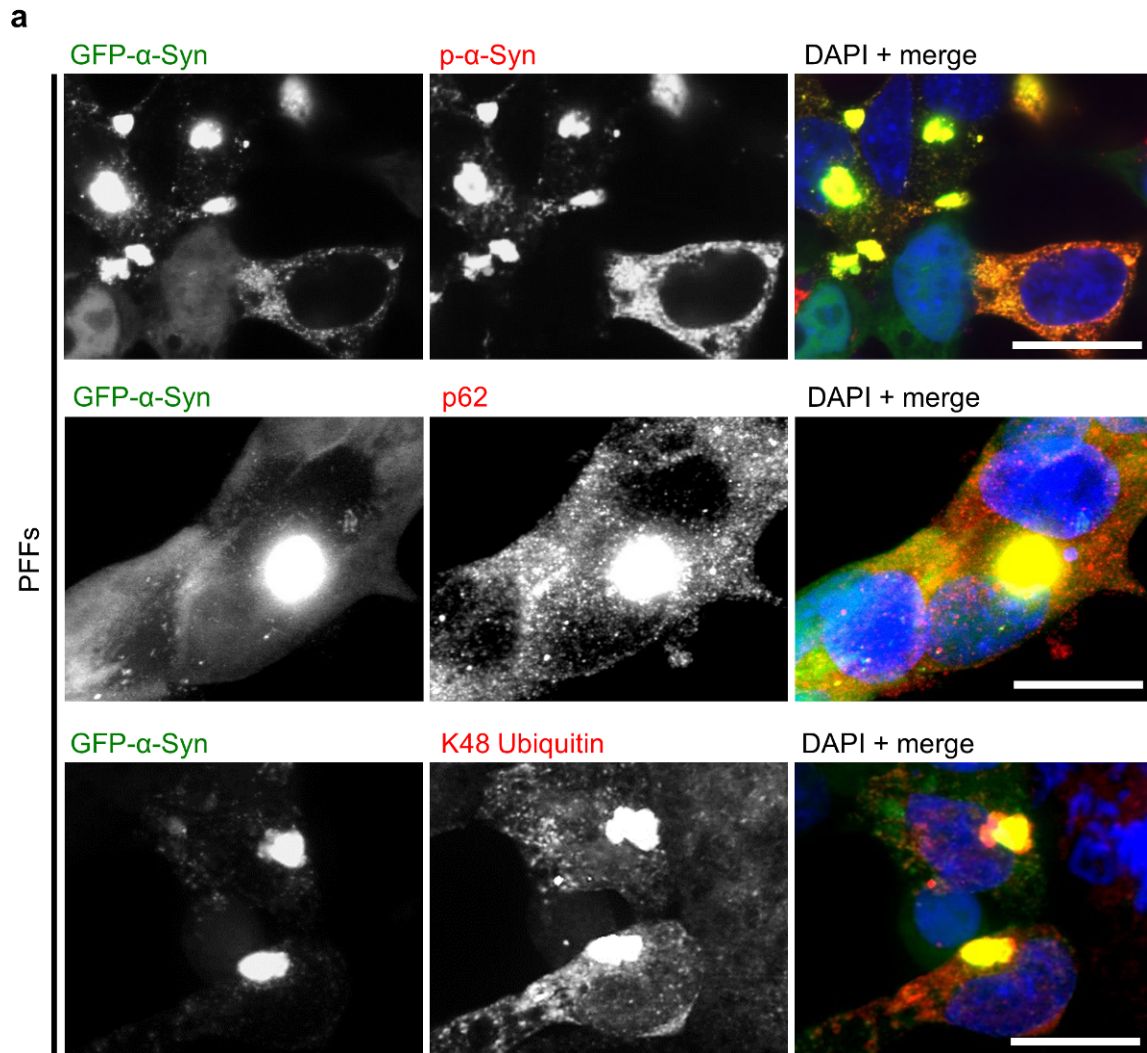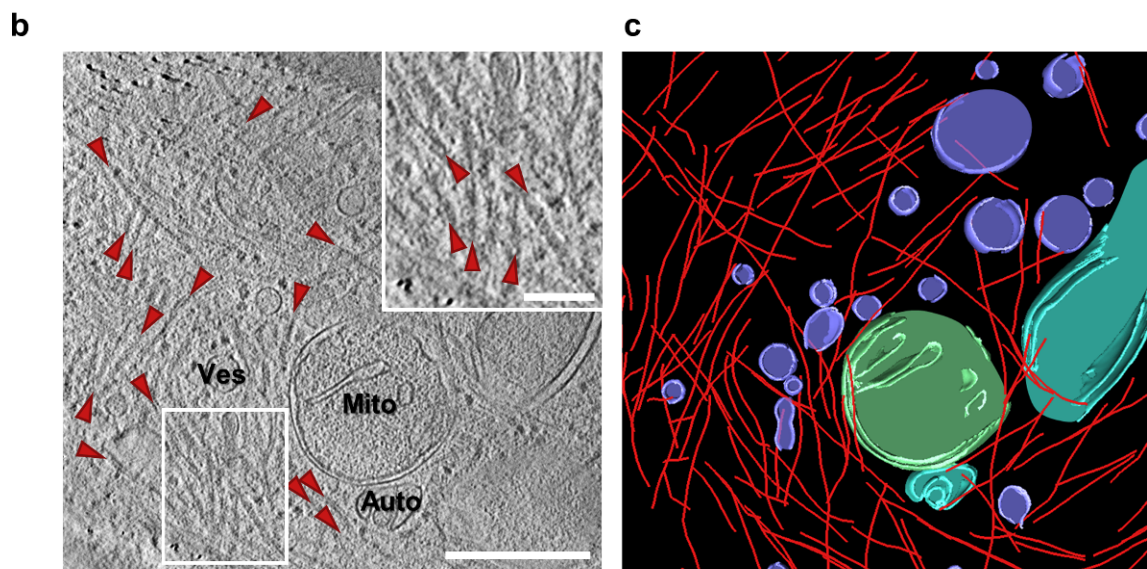

861 **Extended Data Fig. 6 |  $\alpha$ -Syn aggregates in SH-SY5Y cells. a**, Immunofluorescence images of  
862 SH-SY5Y cells stably expressing GFP- $\alpha$ -Syn and seeded with PFFs. The cells develop  $\alpha$ -Syn  
863 inclusions, as detected by antibodies against phosphorylated  $\alpha$ -Syn Ser129 (top), p62 (middle)  
864 and K48-linked ubiquitin (bottom). The merged images show a superposition of the respective  
865 green and red channels plus DAPI (blue). Scale bars: 20  $\mu$ m. **b**, A tomographic slice (thickness  
866 1.8 nm) of an inclusion seeded by PFFs in a SH-SY5Y cell expressing GFP- $\alpha$ -Syn. Auto:  
867 autophagosome; Mito: mitochondrion; Ves: vesicles. Fibrils are marked by red arrowheads.  
868 Scale bars: 350 nm (main panel) and 100 nm (inset). **c**, 3D rendering of **b** showing  $\alpha$ -Syn fibrils  
869 (red), autophagosomes (cyan), mitochondria (green) and various vesicles (purple).  
870

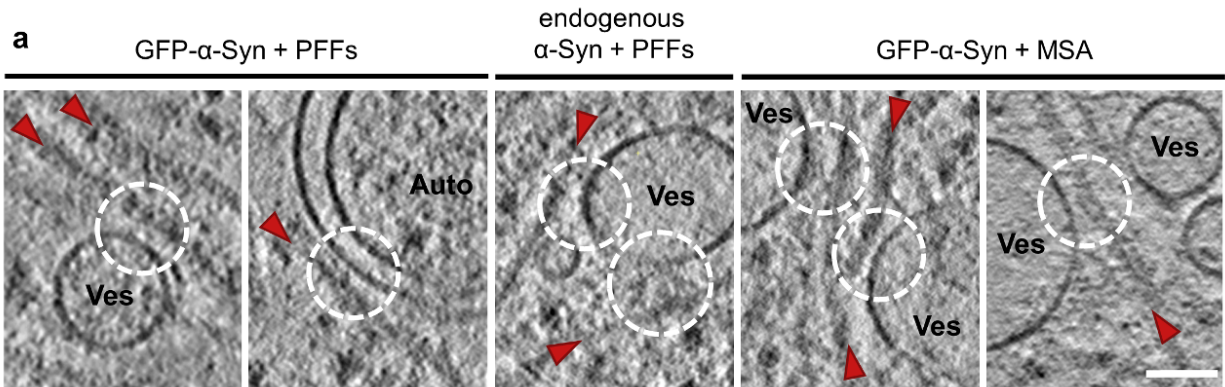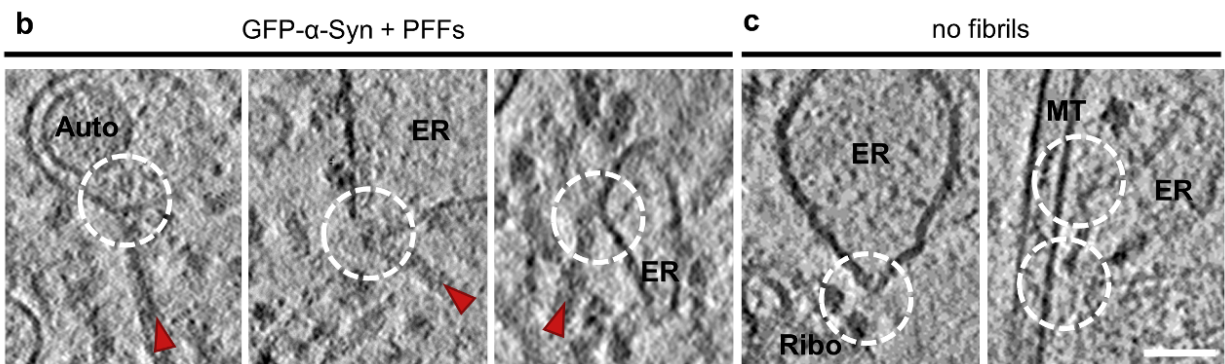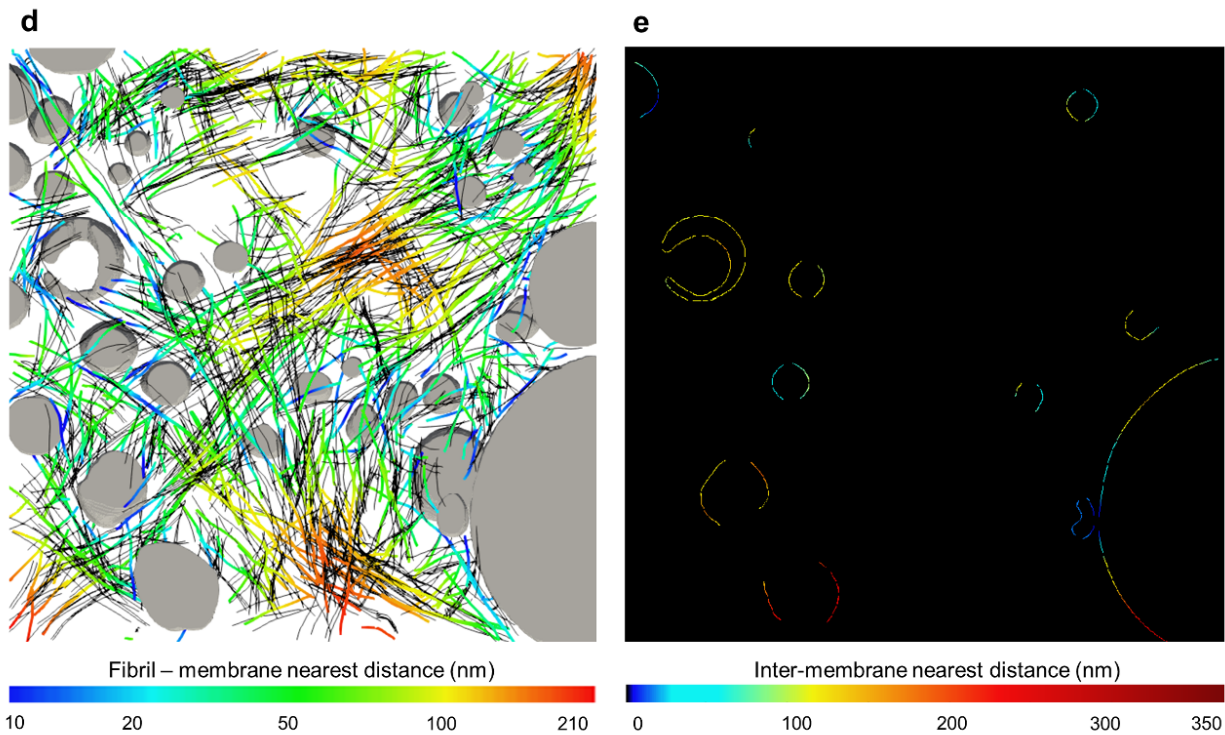

871

872

873 **Extended Data Fig. 7 | Proximity of  $\alpha$ -Syn fibrils and cellular membranes. a**, Gallery of  
874 tomographic slices showing close proximity events (dashed white circles) between  $\alpha$ -Syn fibrils  
875 (red arrowheads) and different cellular membranes with no apparent interactions. Auto:  
876 autophagosome, Ves: vesicles. Tomographic slices are 1.8 nm (GFP- $\alpha$ -Syn + PFFs) or 1.4 nm  
877 (endogenous  $\alpha$ -Syn + PFFs and GFP- $\alpha$ -Syn + MSA) thick. Scale bar: 60 nm. **b**, Gallery of  
878 tomographic slices (thickness 1.8 nm) showing apparent contacts between  $\alpha$ -Syn fibrils and  
879 different cellular membranes at sites of high membrane curvature (dashed white circles). ER:  
880 endoplasmic reticulum. Scale bar: 60 nm. **c**, Tomographic slices showing sites of high membrane  
881 curvature (dashed white circles) in the absence of  $\alpha$ -Syn fibrils. MT: microtubule; Ribo:  
882 ribosome. Tomographic slices are 1.8 nm (left, GFP- $\alpha$ -Syn + PFFs) or 1.4 nm (right, endogenous  
883  $\alpha$ -Syn + PFFs) thick. Scale bar: 60 nm. **d**, 3D rendering shown in Fig. 1d and Fig. 4a with  $\alpha$ -Syn  
884 fibrils color-coded according to their distance to the nearest cellular membrane (grey). To  
885 elucidate whether the events of close proximity between fibrils and membranes were caused by  
886 chance or mediated by molecular interactions, random shifts (by 10 – 20 nm) and rotations  
887 (between 0 and 10°) were performed to the experimentally determined location of the fibrils.  
888 Black lines show 5 simulations for 50 randomly chosen fibrils. **e**, Measurements of inter-  
889 membrane distances for a 2D slice of the tomogram shown in **d**.
